# Supplementary material for: Impact of COVID-19 lockdown on the incidence and patterns of toxic exposures and poisoning in Jordan: a retrospective descriptive study
Source: PubMed Central journal article supplement — BMJ Open. 2021 Dec 9;11(12):e053028. doi: 10.1136/bmjopen-2021-053028 (PMC8662587; doi:10.1136/bmjopen-2021-053028), 2021-12-09
Supplement: bmjopen-2021-053028.draft_revisions.pdf [file bmjopen-2021-053028.draft_revisions.pdf]

# BMJ Open

BMJ Open is committed to open peer review. As part of this commitment we make the peer review history of every article we publish publicly available.

When an article is published we post the peer reviewers' comments and the authors' responses online. We also post the versions of the paper that were used during peer review. These are the versions that the peer review comments apply to.

The versions of the paper that follow are the versions that were submitted during the peer review process. They are not the versions of record or the final published versions. They should not be cited or distributed as the published version of this manuscript.

BMJ Open is an open access journal and the full, final, typeset and author-corrected version of record of the manuscript is available on our site with no access controls, subscription charges or pay-per-view fees (<http://bmjopen.bmj.com>).

If you have any questions on BMJ Open's open peer review process please email [info.bmjopen@bmj.com](mailto:info.bmjopen@bmj.com)

# BMJ Open

## Impact of COVID-19 Lockdown on the Incidence and Patterns of Toxic Exposures and Poisoning in Jordan

|                               |                                                                                                                                                                                                                                                                                                                                                                                                                                                                                                                                                                                                                       |
|-------------------------------|-----------------------------------------------------------------------------------------------------------------------------------------------------------------------------------------------------------------------------------------------------------------------------------------------------------------------------------------------------------------------------------------------------------------------------------------------------------------------------------------------------------------------------------------------------------------------------------------------------------------------|
| Journal:                      | <i>BMJ Open</i>                                                                                                                                                                                                                                                                                                                                                                                                                                                                                                                                                                                                       |
| Manuscript ID                 | bmjopen-2021-053028                                                                                                                                                                                                                                                                                                                                                                                                                                                                                                                                                                                                   |
| Article Type:                 | Original research                                                                                                                                                                                                                                                                                                                                                                                                                                                                                                                                                                                                     |
| Date Submitted by the Author: | 04-May-2021                                                                                                                                                                                                                                                                                                                                                                                                                                                                                                                                                                                                           |
| Complete List of Authors:     | Raffee , Liqaa ; Jordan University of Science and Technology, Accidents and Emergency<br>Daradkeh, Hamza; King Abdullah University Hospital, Accidents and Emergency<br>Alawneh, Khaled ; Jordan University of Science and Technology, Diagnostic Radiology and Nuclear Medicine<br>Al – Fwadleh, Aida; Pharmacy One Poison Center, Administration<br>Aldarweesh, Moath; King Abdullah University Hospital, Emergency and Accidents<br>Hammad, Nouran; Jordan University of Science and Technology, Accidents and Emergency<br>Almasarweh, Sami; Jordan University of Science and Technology, Accidents and Emergency |
| Keywords:                     | COVID-19, Public health < INFECTIOUS DISEASES, Epidemiology < TROPICAL MEDICINE, TOXICOLOGY                                                                                                                                                                                                                                                                                                                                                                                                                                                                                                                           |
|                               |                                                                                                                                                                                                                                                                                                                                                                                                                                                                                                                                                                                                                       |

SCHOLARONE™  
Manuscripts

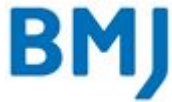

I, the Submitting Author has the right to grant and does grant on behalf of all authors of the Work (as defined in the below author licence), an exclusive licence and/or a non-exclusive licence for contributions from authors who are: i) UK Crown employees; ii) where BMJ has agreed a CC-BY licence shall apply, and/or iii) in accordance with the terms applicable for US Federal Government officers or employees acting as part of their official duties; on a worldwide, perpetual, irrevocable, royalty-free basis to BMJ Publishing Group Ltd ("BMJ") its licensees and where the relevant Journal is co-owned by BMJ to the co-owners of the Journal, to publish the Work in this journal and any other BMJ products and to exploit all rights, as set out in our [licence](#).

The Submitting Author accepts and understands that any supply made under these terms is made by BMJ to the Submitting Author unless you are acting as an employee on behalf of your employer or a postgraduate student of an affiliated institution which is paying any applicable article publishing charge ("APC") for Open Access articles. Where the Submitting Author wishes to make the Work available on an Open Access basis (and intends to pay the relevant APC), the terms of reuse of such Open Access shall be governed by a Creative Commons licence – details of these licences and which [Creative Commons](#) licence will apply to this Work are set out in our licence referred to above.

Other than as permitted in any relevant BMJ Author's Self Archiving Policies, I confirm this Work has not been accepted for publication elsewhere, is not being considered for publication elsewhere and does not duplicate material already published. I confirm all authors consent to publication of this Work and authorise the granting of this licence.

# Impact of COVID-19 Lockdown on the Incidence and Patterns of Toxic Exposures and Poisoning in Jordan

A retrospective descriptive study

Liqaa A. Raffee<sup>1</sup>, Hamza Daradkeh<sup>2</sup>, Khaled Z. Alawneh<sup>1</sup>, Aida I. Al – Fwadleh<sup>3</sup>, Moath N. Darweesh<sup>1</sup>, Nouran H. Hammad<sup>1</sup>, Sami A. Almasarweh<sup>1</sup>

<sup>1</sup> Jordan University of Science and Technology (J.U.S.T)

<sup>2</sup> King Abdullah University Hospital (affiliated to J.U.S.T).

<sup>3</sup> Pharmacy one™ Poison center

For any correspondence on this article, please notify the corresponding author, Dr. Liqaa A. Raffee, Head of Accidents and Emergency department, Jordan University of Science and Technology, Jordan – Irbid, Email: [laraffee5@just.edu.jo](mailto:laraffee5@just.edu.jo) , Phone: 00962795313555

**Abstract:**

Objectives: To describe the effect of the COVID-19 lockdown in Jordan (March 21, 2020 – May 21, 2020) on the incidence and patterns of toxic exposures and poisoning as compared to the same period from the previous year (March 21, 2019 – May 21, 2019).

Design: A retrospective descriptive study.

Methods: Call data sourced from Pharmacy One™ Poison Center was revised from the lockdown period (March 21, 2020 to May 21, 2020) and the same period during 2019 (March 21, 2019 to May 21, 2019). A database was established and analyzed.

Results: We noticed that not only did calls increased, but there was also a noticeable change in call patterns. Calls increased by 91% during the lockdown period. Drugs were the most common among types of exposure, and the most prevalent route of exposure was ingestion. There was a notable increase in ocular exposure (550%). The majority of exposures were at home and there were no occupational exposures. We found that there is an increase in household cleaner's exposure among males and increase in alcohol exposure in females. Children aged below 5 are the most affected. Even though there is an increase in the total number of cases, severe cases decreased.

Conclusion: The effect of the lockdown on rates of toxic exposures was prominent, whether through the increase in calls or the change in patterns. As people spent more time at home, their exposure to toxic agents increased. Cleaning recommendations led to the misuse of cleaning and disinfectant products, increasing exposures related to abating the COVID-19 infection.

Key words: COVID-19, Lockdown, Toxic Exposures, Poisoning, Poison Control Center.

### Article Summary:

This article addresses the following points:

- 1- The exposure patterns during COVID-19 lockdown.
- 2- The COVID-19 lockdown effect on the numbers and patterns of exposures.
- 3- It highlights specific exposures related to COVID-19 infection control efforts, management protocols, or self medication.
- 4- It highlights the important role poison control centers could play during crises.
- 5- Information presented in this study can be taken in consideration while planning healthcare policies.

Strengths and Limitations of the study:

- 1) This study addresses different aspects of toxic exposures during the lockdown.
- 2) Our data represent the majority of calls related to toxic exposures in Jordan.
- 3) Not all exposures were reported to the poison center.
- 4) Poisoning specialists make their judgment and management recommendations based on the caller's information
- 5) It was not possible to access data from other poison centers in the country

More details on strength and limitations were written in the discussion section.

1  
2  
3 **Title: Impact of COVID-19 Lockdown on the Incidence and Patterns of Toxic Exposures**  
4 **and Poisoning in Jordan.**  
5  
6

7  
8 **Objectives:** To describe the effect of the COVID-19 lockdown in Jordan (March 21, 2020 –  
9 May 21, 2020) on the incidence and patterns of toxic exposures and poisoning as compared to  
10 the same period from the previous year (March 21, 2019 – May 21, 2019).  
11  
12  
13  
14  
15

16 **Design:** A retrospective descriptive study.  
17  
18

19 **Methods:** Data source: There are three poison centers in Jordan, the first one is affiliated with  
20 Royal Medical Services, and the other is affiliated with Jordan University. The third one is the  
21 Pharmacy One™ Poison center. Each one of these centers is working independently, and there is  
22 no central reporting system. We select to study data from Pharmacy One™ poison center  
23 because it's the only center responsible for responding to civil defense calls the primary  
24 emergency response service in Jordan (911).  
25  
26  
27  
28  
29  
30  
31  
32  
33

34 Pharmacy One™ poison center is a large non-profit national poison center that receives  
35 unrestricted calls from the public, healthcare workers, and emergency services (911), runs for 24  
36 hours per day, over 7 days a week, and provides free professional advice and management  
37 information regarding toxic exposures and poisoning.  
38  
39  
40  
41  
42  
43

44 **Data collection:** The electronic records of Pharmacy One™ poison center were revised for the  
45 period (March 21, 2020 to May 21, 2020). All calls related to toxic exposures or poisoning were  
46 included and analyzed. In addition, all calls for the same period during 2019 (March 21, 2019 to  
47 May 21, 2019) were included and analyzed too. For each case, data about the call source (general  
48 public, healthcare worker or emergency services (911), demographic data (age, gender), data  
49 about exposure (type, site, route, and reason of exposure), and medical outcome were collected.  
50  
51  
52  
53  
54  
55  
56  
57  
58  
59  
60

1  
2  
3 Medical outcomes were classified into no effect, mild, moderate, and severe effect based on  
4  
5 Poison Severity Score, a standardized scheme for grading the severity of poisoning described by  
6  
7 Persson and colleagues [1].  
8  
9

10 Microsoft excel was utilized for establishing a database, graphs creation, and data analysis.

11  
12 Percentages of change in exposure are calculated based on the following equation:  
13  
14

15  
16  
17  
18  
19 
$$\% \text{ of } \Delta = \left( \frac{\text{Percentage during Lockdown} - \text{Percentage during 2019}}{\text{Percentage during 2019}} \right) \times 100\%$$
  
20  
21  
22  
23  
24  
25

26 According to IRB policy at our institution, this study is exempted from review and approval. We  
27  
28 took a consent form for data collection and records review, being that Pharmacy One™ poison  
29  
30 center does not record the patient or caller name or any personal data.  
31  
32  
33  
34  
35  
36

37 Patient and Public statement: Patients or the public were not involved in the design, or conduct,  
38  
39 or reporting, or dissemination plans of this study.  
40  
41  
42  
43  
44

45 **Introduction:** Coronavirus Disease 2019 (COVID-19) caused by the novel Coronavirus (SARS-  
46  
47 CoV-2) was first reported in Wuhan, China in December of 2019 [2]. The World Health  
48  
49 Organization (WHO) characterized the disease as a pandemic on March 11, 2020[3]. The rapid  
50  
51 increase in the number of cases and deaths, along with the lack of vaccines and effective medical  
52  
53 therapy; in the early course of the pandemic, has led to a global emergency response [4, 5]. Many  
54  
55  
56  
57  
58  
59  
60



1  
2  
3 countries adopted classical public health measures including, isolation and quarantine, social  
4 distancing, and community containment to slow down the spread of SARS-CoV-2 virus [5-8]. In  
5  
6 initial stages of the pandemic, lack of adequate information on the most effective prevention and  
7  
8 treatment strategies allowed the spread of misinformation and resulted in the improper use of  
9  
10 drugs, chemicals, and traditional remedies for their presumed protective or therapeutic roles even  
11  
12 though many of these substances are known for their harmful and toxic effects [9-13].  
13  
14  
15

16  
17  
18 Poison centers from the United States, Canada, and France reported a spike in calls related to  
19  
20 toxic exposures during the COVID-19 lockdown [14-17]. Reported exposures included the  
21  
22 improper use of medications, self-medication, and household chemicals [18-20]. However, the  
23  
24 majority of the reported exposures were related to drugs supposed to be effective in COVID-19  
25  
26 treatment protocols, hand sanitizers, disinfectants, household cleaners, and alcohol [21-23].  
27  
28  
29

30  
31 The first case of COVID-19 in Jordan was confirmed on March 2, 2020. The Jordanian  
32  
33 government announced a national lockdown that came into effect on March 21, 2020 and  
34  
35 continued through to May 31, 2020. During this lockdown, there was a stay-at-home order with  
36  
37 suspension of all social, religious, and work activities except for a few-hours window period  
38  
39 each day allowing people to buy their essential goods [24]. We believe that the lockdown has led  
40  
41 to an increase in toxic exposures and poisoning cases, especially those associated with cleaners,  
42  
43 hand sanitizers, and alcohol. This study will analyze the patterns of toxic exposures and  
44  
45 poisoning among the Jordanian population during the COVID-19 lockdown as compared with  
46  
47 the exact period of the previous year.  
48  
49  
50  
51  
52  
53  
54  
55  
56  
57  
58  
59  
60

## Results:

During the Covid-19 lockdown from March 21 to May 21, 2020, Pharmacy One™ Poison Center received a total of 544 calls related to toxic exposures, which represents a 91% increase in the number of calls during the same period in 2019 (285). Drug exposure calls ranked first with a total of 321 calls (59% of total calls), followed by household cleaners (83 calls, 15% of total calls), and alcohol exposure (37 cases, 7%). Toxic gases (8 cases, 1%) and toxic plants (1 case, < 1%) were among the least reported exposures. Notably, exposures related to toxic gases, alcohol, domestic animal bites, household cleaners, drugs, and heavy metals increased by (300%, 208%, 175%, 159%, 128%, 33%, respectively), whereas exposures related to snake bites, scorpion stings, toxic plants, and food decreased by (100%, 55%, 50%, 18% respectively). (Table, Figure 1 near here)

The most prevalent route of exposure was ingestion with 446 cases (82%), followed by dermal (56 cases, 10%), and inhalation (18 cases, 3%). Compared to 2019, there was a notable rise in ocular exposures (550% increase; 13 cases in 2020 compared to 2 cases in 2019), ingestion exposures (increased by 104%; 446 cases in 2020 compared to 219 cases in 2019) and inhalational exposures (50% increase; 18 cases in 2020 compared to 12 in 2019). (Table, figure 2 near here). Most exposures occurred at home (528 cases, 97%) followed by outdoor exposures (14 cases, 3%). While home exposures increased by 103%, outdoor, work, and school exposures decreased by 26%, 60%, 100%, respectively. (Table, figure 3 near here)

As of the reason and motive of exposure, unintentional exposures in the lockdown constitute 75% of exposures (406 cases), followed by therapeutic, suicidal, and intentional exposures (35 cases, 33 cases, 31 cases, respectively, 6% each). There was a marked increase in intentional

1  
2  
3 exposures by 933% (3 cases in 2019, 31 cases in lockdown), medical errors by 175% (8 cases in  
4  
5 2019, 22 cases in lockdown), unintentional by 142% (168 cases in 2019, 406 cases in lockdown),  
6  
7 and therapeutic exposures by 119% (16 cases in 2019, 35 cases in lockdown). On the other hand,  
8  
9 occupational exposures (9 cases in 2019, 0 cases in lockdown), bites and stings (31 cases in  
10  
11 2019, 3 cases in lockdown), and suicidal exposures (36 cases in 2019, 33 cases in lockdown)  
12  
13 decreased by 100%, 90%, 8%, respectively. (Table, figure 4 near here)  
14  
15  
16

17  
18 57% (310 cases) of the exposures occurred in males, and 43% (243 cases) occurred in females.  
19  
20 Males reported more drug exposures by 64% cases vs. 53% in females (198 vs. 123 cases). In  
21  
22 contrast, females reported more alcohol exposures by 10% vs. 4% in males (24 vs. 13 cases).  
23  
24 Males reported a drastic increase in exposures related to household cleaners by 236% vs. 100%  
25  
26 increase for females. Females reported an increase in alcohol exposure by 243% vs. 160% for  
27  
28 males. The exposure to toxic gases was the same when comparing genders, both increasing by  
29  
30 300%. (Table, figure 5 near here) Exposures were reported in all age groups, with children from  
31  
32 0-5years being the most affected by 61% of the cases (332 cases), followed by the age group 21-  
33  
34 50 years by 19% (104 cases). The age group from 11-15 years reported the sharpest increase in  
35  
36 exposures by 275%, followed by age group over 50 years by 143% increase, and age group from  
37  
38 0-5 years by 134%. (Table, figure 6 near here)  
39  
40  
41  
42  
43

44 There were 292 (54%) calls from emergency services [911], 156 (29%) calls from the general  
45  
46 public, and 96 (18%) calls from healthcare workers, with an increase of 170%, 68%, and 14%  
47  
48 respectively. (Table, figure 7 near here)  
49  
50

51  
52 Lastly, based on the Poison Severity Score (PSS), 37% (201 cases) of the cases subsided with no  
53  
54 effects, 42% (228 cases) with minor effects, 17% (90 cases) with moderate effects, 5% (25 cases)  
55  
56  
57  
58  
59  
60

1  
2  
3 with severe effects, and no deaths were reported. 10% (54 cases) needed hospital admissions,  
4 and 56% (30 cases) who needed admission were children less than five years. 41% of total  
5  
6  
7  
8 emergency service calls were closed only based on poison center advice, with no reported  
9  
10  
11 adverse outcomes. The number of cases resolved with no effects or minor effects increased by  
12  
13 673%, 140%, respectively, and those with moderate or severe effects decreased by 31%, 24%,  
14  
15 respectively. The total number of admissions increased by 260% (15 cases in 2019 compared to  
16  
17 54 cases in lockdown), and admissions for children from 0-5 years increased by 329% (7 cases in  
18  
19 2019 compared to 30 cases in lockdown). The emergency service dispatch rate decreased by  
20  
21  
22 33%. (Table near here, figure 8 near here)  
23  
24  
25  
26  
27

## 28 **Discussion**

29  
30  
31 Our study showed that lockdown resulted in a 91% increase in calls related to toxic exposures as  
32  
33 well as a pattern change compared to the previous year. Poison centers have also reported similar  
34  
35 results in the United States, Canada, and France [14-16]. We didn't find apparent reason for such  
36  
37 an increase. However, Le-Roux and colleagues suggest a possible explanation for this rise is the  
38  
39 behavioral modifications caused by fear of coronavirus, including excessive house cleaning and  
40  
41 misuse of cleaning products for personal hygiene or food sanitation [17]. Another additional  
42  
43 factor is the decrease in cognitive performance and decision-making induced by isolation  
44  
45 measures, combined with increased impulsivity contributing to such increase [17]. Chang and  
46  
47 colleagues ascribe such increase to the cleaning recommendation and guidelines issued by many  
48  
49 health care agencies and social media [14].  
50  
51  
52  
53  
54  
55  
56  
57  
58  
59  
60

1  
2  
3 Our study showed an increase in exposures related to toxic gases, alcohol, household cleaners,  
4 drugs, and domestic animal bites. Toxic gases exposure includes the well-described chlorine gas  
5 that results from mixing bleach and other household chemicals [17]. Notably guidelines  
6 disseminated in the early days of the pandemic as part of public infection-control campaigns  
7 have led to the misuse of alcohol-based hand sanitizers and household cleaners [14, 15].  
8  
9  
10  
11  
12  
13  
14  
15  
16  
17  
18  
19  
20  
21  
22  
23  
24  
25  
26  
27  
28  
29  
30  
31  
32  
33  
34  
35  
36  
37  
38  
39  
40  
41  
42  
43  
44  
45  
46  
47  
48  
49  
50  
51  
52  
53  
54  
55  
56  
57  
58  
59  
60

Reportedly, disinfectants erroneously used to disinfect vegetables, and alcohol-based hand sanitizers applied to the whole body resulting in burns, or the use of highly concentrated sodium hypochlorite are examples of how people falsely interpret these campaigns[17]. Canadian poison centers have also reported similar increases in exposures to bleaches, hand sanitizers, disinfectants, chlorine and chloramine gas [15].

Exposures to drugs in our study were primarily observed in children. A possible explanation for such an observation is that families stocked drugs anticipating shortages, along with stay-at-home policy, children spent more time at home, increasing their accidental exposure to such drugs [17]. This contradicts reports from France, where a fall in drug exposures was noted, which was linked to fall in suicidal attempts by drugs [17]. No reported cases of exposures due to drugs used in COVID-19 treatment. Also illicit drugs are not reported to our poison center.

We noted an increase in bites related to domestic animals. Similarly, Dixon et al. described a threefold rise in pediatric ER visits due to dog bites during the stay-at-home lockdown policy, owing such observation to decreased adult supervision over children, and increased dog stress because of confinement [25]. On the other hand, we noticed fewer snake bites, scorpion stings, toxic plant exposures, and occupational exposures, as home internment and weather conditions averted such exposures.

1  
2  
3 Our study showed increased exposure in all age groups, but a remarkable observation was the  
4 high increase in exposure in adolescents (11-15 y) group. It's possible that even though this age  
5 group understands what these chemicals are used for, they have little awareness about the  
6 potential toxicity. Other similar studies showed different age group observations. For example,  
7 the French poison center reported an increase in exposure in all age groups except 5-25 y group,  
8 and the most significant increase occurred in patients over 65 years [17]. Likewise, the Canadian  
9 poison center didn't notice an increase in exposure in those below the age of 19 years [15]. In  
10 fact, children below 5 years represented a large percentage of calls received during the study  
11 period. This might be due to closure of schools and kindergartens, with children spending more  
12 time at home, and therefore they have more chance for exposure [17]. Furthermore, Teleworking  
13 and homeschooling for older children contributed to such increase by shifting parent's attention  
14 away from younger children [17].

15  
16 Among routes of exposure, the ocular route recorded the sharpest increase. This observation may  
17 be due to the fact that eyes are involved in chemical exposure, whether by accidental spraying of  
18 the eyes or touching the eyes after hand or face sanitation or via exposure to vapors. A study  
19 from the United States found that inhalational route observed the highest increase during the  
20 lockdown [14].

21  
22 While intentional exposures increased during the lockdown, we suggest that the increase was due  
23 to attempts to protect from acquiring infection. Canadian poison center reported a similar  
24 observation [15]. Oppositely; we have noticed that suicidal exposures during the lockdown have  
25 decreased. This fall could be arguably due to the social and family support created by the stay-at-  
26 home order. French poison center reported a similar observation [17].

1  
2  
3 We noted a decrease in calls from healthcare workers. This decrease was accompanied by a fall  
4 in the proportion of severe cases despite the increase in hospital admission. French poison center  
5 reported similar findings [17]. A possible explanation would be related to under-reporting cases  
6 as the volume of COVID-19 patients overwhelms the healthcare systems. Other causes of such  
7 observation are linked to the increase in awareness of toxic exposures and thereby reporting  
8 cases before progressing to a more severe presentation.  
9

10  
11  
12 This study has its strength and limitations. Our data represent the majority of calls related to  
13 toxic exposures in Jordan, as Pharmacy One™ poison center is the only center responsible for  
14 responding to calls from civil defense, the primary emergency response service in Jordan (911).  
15 It also receives calls unrestrictedly from the public and healthcare workers at all times. However,  
16 this study has its limitations. Not all exposures were reported to the poison center, because many  
17 were treated at home or sought direct medical help without notifying the poison center.  
18 Furthermore severely intoxicated or dead people usually arrive directly at the hospital without  
19 reporting the incidence to any poison center. In addition poisoning specialists make their  
20 judgment and management recommendations based on the caller's information. Some cases were  
21 closed by simple advice over the phone without onsite confirmation of the nature of exposure.  
22 Lastly, there were difficulties accessing data from other poison centers.  
23  
24  
25  
26  
27  
28  
29  
30  
31  
32  
33  
34  
35  
36  
37  
38  
39  
40  
41  
42  
43

44 In conclusion, there is a change in both the number and pattern of toxic exposure related calls  
45 during the lockdown, mostly due to fear of coronavirus. Exposures related to toxic gases,  
46 alcohol, household cleaners, drugs, and domestic animal bites have increased, whereas exposures  
47 related to snake bites, scorpion stings, toxic plants, and occupational exposures have decreased.  
48  
49 This observed increase in calls involved all age groups, with children below 5 years accounting  
50 for the largest percentage. Ocular exposures showed the sharpest increase among all exposure  
51  
52  
53  
54  
55  
56  
57  
58  
59  
60

1  
2  
3 routes. While intentional exposures showed a remarkable increase, those exposures were not of  
4  
5 suicidal nature. In fact our study showed a decrease in suicidal exposures. In addition, calls from  
6  
7 healthcare workers have decreased, as well as case severity, while hospital admission rate  
8  
9 increased. This study highlights the important role of poison centers, as they help decrease the  
10  
11 burden on healthcare facilities. Also, they can provide invaluable information about exposures  
12  
13 that could be taken in consideration when planning healthcare policies.  
14  
15  
16  
17  
18  
19  
20

21 **Conflict of interest:** The authors declare that there is no conflict of interest.  
22  
23

24 **Funding statement:** This research received no specific grant from any funding agency in the  
25  
26 public, commercial or not-for-profit sectors  
27  
28

29 **Disclosures:** The authors have nothing to disclose.  
30  
31

32 **IRB approval:** According to IRB policy at our institution, this study is exempted from review  
33  
34 and approval, as it is a retrospective review of records, where patient's names or personal  
35  
36 information couldn't be identified.  
37  
38  
39

40 **Data sharing statement:** Data supporting the finding of this article are available upon request.  
41  
42

#### 43 **Authors contributions:**

44  
45

46 LR, HD, KA, AF: Conceptualization, study design. LR, HD: project administration. AF: data  
47  
48 collection. NH, HD: literature search and review. HD: draft the initial manuscript. LR, HD, MD,  
49  
50 and SM: edit and write the final manuscript.  
51  
52  
53

54 All authors read, edit, proof-read, and approve the final manuscript before submission.  
55  
56  
57  
58  
59  
60



**References:**

- [1]. Persson H, Sjöberg G, Haines J, Pronczuk de Garbino J. Poisoning Severity Score: Grading of acute poisoning. *J Toxicology - Clinical Toxicology* (1998) 36:205-13
- [2]. Zhu N, Zhang D, Wang W, et al. A novel coronavirus from patients with pneumonia in China, 2019. *N Engl J Med*. 2020;382(8):727–733.
- [3]. WHO Director-General's opening remarks at the media briefing on COVID-19 -11 March 2020, Accessed on 5 march 2020, <https://www.who.int/director-general/speeches/detail/who-director-general-s-opening-remarks-at-the-media-briefing-on-covid-19---11-march-2020>.
- [4]. Dale Fisher, Annelies Wilder-Smith, The global community needs to swiftly ramp up the response to contain COVID-19, *The Lancet*, Volume 395, Issue 10230, 2020, Pages 1109-1110, ISSN 0140-6736, [https://doi.org/10.1016/S0140-6736\(20\)30679-6](https://doi.org/10.1016/S0140-6736(20)30679-6).
- [5]. Neil M Ferguson, Daniel Laydon, Gemma Nedjati-Gilani et al. Impact of non-pharmaceutical interventions (NPIs) to reduce COVID-19 mortality and healthcare demand. Imperial College London (16-03-2020), doi: <https://doi.org/10.25561/77482>.
- [6]. A Wilder-Smith, MD, D O Freedman, MD, Isolation, quarantine, social distancing and community containment: pivotal role for old-style public health measures in the novel coronavirus (2019-nCoV) outbreak, *Journal of Travel Medicine*, Volume 27, Issue 2, March 2020, taaa020, <https://doi.org/10.1093/jtm/taaa020>

- 1  
2  
3 [7]. Anderson RM, Heesterbeek H, Klinkenberg D, Hollingsworth TD. How will country-based  
4 mitigation measures influence the course of the COVID-19 epidemic? *Lancet*.  
5  
6 2020;395(10228):931–4.  
7  
8  
9  
10  
11  
12 [8]. Hien Lau, Veria Khosrawipour, Piotr Kocbach, Agata Mikolajczyk, Justyna Schubert, Jacek  
13 Bania, Tanja Khosrawipour, The positive impact of lockdown in Wuhan on containing the  
14 COVID-19 outbreak in China, *Journal of Travel Medicine*, Volume 27, Issue 3, April 2020,  
15 taaa037, <https://doi.org/10.1093/jtm/taaa037>  
16  
17  
18  
19  
20  
21  
22  
23  
24 [9]. Zarocostas J. How to fight an infodemic. *Lancet* (London, England) [Internet].  
25 2020;395(10225):676. Available from: [http://dx.doi.org/10.1016/S0140-6736\(20\)30461-X](http://dx.doi.org/10.1016/S0140-6736(20)30461-X)  
26  
27  
28  
29  
30  
31 [10]. Depoux A, Martin S, Karafillakis E, Preet R, Wilder-Smith A, Larson H. The pandemic  
32 of social media panic travels faster than the COVID-19 outbreak. *J Travel Med*.  
33 2020;27(3):1–2.  
34  
35  
36  
37  
38  
39  
40 [11]. Michael Gottlieb, Sean Dyer · Information and Disinformation: Social Media in the  
41 COVID-19 Crisis, *Acad Emerg Med* 2020 Jul;27(7):640-641. doi:  
42 10.1111/acem.14036. Epub 2020 Jun 24  
43  
44  
45  
46  
47  
48  
49 [12]. The Lancet Infectious Diseases. The COVID-19 infodemic. *Lancet Infect Dis* [Internet].  
50 2020;20(8):875. Available from: [http://dx.doi.org/10.1016/S1473-3099\(20\)30565-X](http://dx.doi.org/10.1016/S1473-3099(20)30565-X)  
51  
52  
53  
54  
55  
56  
57  
58  
59  
60

- 1  
2  
3 [13]. Galvão J. COVID-19: the deadly threat of misinformation. *Lancet Infect Dis*.  
4  
5 2020;3099(20):30721.  
6  
7  
8  
9  
10 [14]. Chang A, Schnall AH, Law R, et al. Cleaning and Disinfectant Chemical Exposures and  
11  
12 Temporal Associations with COVID-19 — National Poison Data System, United States,  
13  
14 January 1, 2020–March 31, 2020. *MMWR Morb Mortal Wkly Rep* 2020;69:496–498.  
15  
16 DOI: <http://dx.doi.org/10.15585/mmwr.mm6916e1>  
17  
18  
19  
20  
21 [15]. Yasseen III A, Weiss D, Remer S, et al. Increases in exposure calls related to selected  
22  
23 cleaners and disinfectants at the onset of the COVID-19 pandemic: data from Canadian  
24  
25 poison centres. *Health Promotion and Chronic Disease Prevention in Canada : Research,*  
26  
27 *Policy and Practice*. 2021 Jan;41(1):25-29. DOI: 10.24095/hpcdp.41.1.03  
28  
29  
30  
31  
32  
33 [16]. COVID-19: home poisoning throughout the containment period. Gael Le Roux<sup>1</sup>; Sandra  
34  
35 Sinno-Tellier<sup>2</sup>; French Poison Control Centre members; Alexis Descatha<sup>3</sup>. *The lancet public*  
36  
37 *health* DOI: 10.1016/S2468-2667(20)30095-5  
38  
39  
40  
41  
42  
43  
44 [17]. Gaël Le Roux, Sandra Sinno-Tellier, Emmanuel Puskarczyk, Magali Labadie, Katharina  
45  
46 von Fabeck, Fanny Pélissier, Patrick Nisse, Nathalie Paret, French PCC Research Group,  
47  
48 Alexis Descatha & Dominique Vodovar (2021) Poisoning during the COVID-19 outbreak  
49  
50 and lockdown: retrospective analysis of exposures reported to French poison control  
51  
52 centres, *Clinical Toxicology*, DOI: 10.1080/15563650.2021.1874402  
53  
54  
55  
56  
57  
58  
59  
60

- 1  
2  
3 [18]. Richards GC. Alcohol-based hand sanitisers: a warning to mitigate future poisonings and  
4 deaths BMJ Evidence-Based Medicine Published Online First: 01 December 2020. doi:  
5  
6 10.1136/bmjebm-2020-111568  
7  
8  
9  
10  
11  
12 [19]. Wong, A. (2020), COVID-19 and toxicity from potential treatments: Panacea or poison.  
13 Emergency Medicine Australasia, 32: 697-699. <https://doi.org/10.1111/1742-6723.13537>  
14  
15  
16  
17  
18  
19 [20]. Mohammad Delirrad, Ali Banagozar Mohammadi, New Methanol Poisoning Outbreaks  
20 in Iran Following COVID-19 Pandemic, Alcohol and Alcoholism, Volume 55, Issue 4, July  
21 2020, Pages 347–348, <https://doi.org/10.1093/alcalc/aga036>  
22  
23  
24  
25  
26  
27  
28 [21]. Chary MA, Barbuto AF, Izadmehr S, Hayes BD, Burns MM. COVID-19: Therapeutics  
29 and Their Toxicities. J Med Toxicol. 2020 Jul;16(3):284-294. doi: 10.1007/s13181-020-  
30 00777-5. Epub 2020 Apr 30. PMID: 32356252; PMCID: PMC7192319.  
31  
32  
33  
34  
35  
36  
37 [22]. Yip L, Bixler D, Brooks DE, et al. Serious Adverse Health Events, Including Death,  
38 Associated with Ingesting Alcohol-Based Hand Sanitizers Containing Methanol — Arizona  
39 and New Mexico, May–June 2020. MMWR Morb Mortal Wkly Rep 2020;69:1070–1073.  
40  
41  
42  
43  
44  
45  
46  
47  
48  
49 [23]. Alcohol use and misuse during the COVID-19 pandemic: a potential public health crisis?  
50  
51 James M Clay<sup>a</sup> and Matthew O Parker<sup>b</sup>, Lancet Public Health. 2020 May,  
52  
53  
54  
55  
56  
57  
58  
59  
60

[24]. Prime ministry of Jordan, official web site , <http://www.pm.gov.jo/upload/files/Order-Defense-2.pdf>, accessed on march 5, 2020

[25]. Cinnamon A. Dixon, Rakesh D. Mistry, Dog Bites in Children Surge during Coronavirus Disease-2019: A Case for Enhanced Prevention, The Journal of Pediatrics, Volume 225,2020,Pages 231-232,ISSN 0022-3476, <https://doi.org/10.1016/j.jpeds.2020.06.071>.

Table: Incidence and Patterns of Toxic exposures and poisoning Among Jordanian Population during COVID-19 Lockdown and 2019 (March-May).

|                            |                         | 2019            |          | COVID-19 Lockdown |           | % of Δ      |               |
|----------------------------|-------------------------|-----------------|----------|-------------------|-----------|-------------|---------------|
|                            |                         | Number of Cases |          | Number of Cases   |           |             |               |
| Total Number of Cases      |                         | 285             |          | 544               |           | 91%         |               |
| Class of Exposure          | Drugs                   | 141 (49%)       |          | 321 (59%)         |           | 128%        |               |
|                            | Household Cleaners*     | 32 (11%)        |          | 83 (15%)          |           | 159%        |               |
|                            | Alcohol*                | 12 (4%)         |          | 37 (7%)           |           | 208%        |               |
|                            | Pesticides              | 20 (7%)         |          | 20 (4%)           |           | 0%          |               |
|                            | Hydrocarbons*           | 16 (6%)         |          | 17 (3%)           |           | 6%          |               |
|                            | Food                    | 17 (6%)         |          | 14 (3%)           |           | -18%        |               |
|                            | Insect bites            | 14 (5%)         |          | 15 (3%)           |           | 7%          |               |
|                            | Domestic Animals bites* | 4 (1%)          |          | 11 (2%)           |           | 175%        |               |
|                            | Heavy Metals            | 9 (3%)          |          | 12 (2%)           |           | 33%         |               |
|                            | Toxic Gases (chlorine)* | 2 (1%)          |          | 8 (1%)            |           | 300%        |               |
|                            | Scorpion stings         | 11 (4%)         |          | 5 (1%)            |           | -55%        |               |
|                            | Snake bites             | 5 (2%)          |          | 0 (0%)            |           | -100%       |               |
|                            | Toxic Plants            | 2 (1%)          |          | 1 (0%)            |           | -50%        |               |
| Route of Exposure          | Ingestion               | 219 (77%)       |          | 446 (82%)         |           | 104%        |               |
|                            | Inhalation              | 12 (4%)         |          | 18 (3%)           |           | 50%         |               |
|                            | Dermal                  | 46 (16%)        |          | 56 (10%)          |           | 22%         |               |
|                            | Parantral               | 3 (1%)          |          | 3 (1%)            |           | 0%          |               |
|                            | Ocular                  | 2 (1%)          |          | 13 (2%)           |           | 550%        |               |
|                            | Others*                 | 3 (1%)          |          | 8 (1%)            |           | 167%        |               |
| Site of Exposure           | Work                    | 5 (2%)          |          | 2 (0%)            |           | -60%        |               |
|                            | Outdoor                 | 19 (7%)         |          | 14 (3%)           |           | -26%        |               |
|                            | Home                    | 260 (91%)       |          | 528 (97%)         |           | 103%        |               |
|                            | School                  | 1 (0%)          |          | 0 (0%)            |           | -100%       |               |
| Reason of Exposure         | Suicidal                | 36 (13%)        |          | 33 (6%)           |           | -8%         |               |
|                            | Unintentional           | 168 (59%)       |          | 406 (75%)         |           | 142%        |               |
|                            | Occupational            | 9 (3%)          |          | 0 (0%)            |           | -100%       |               |
|                            | Medical Consultation*   | 14 (5%)         |          | 14 (3%)           |           | 0%          |               |
|                            | Therapeutic*            | 16 (6%)         |          | 35 (6%)           |           | 119%        |               |
|                            | Intentional             | 3 (1%)          |          | 31 (6%)           |           | 933%        |               |
|                            | Medical Error           | 8 (3%)          |          | 22 (4%)           |           | 175%        |               |
| Bite/Sting                 | 31 (11%)                |                 | 3 (1%)   |                   | -90%      |             |               |
| Distribution by Age Groups | 0-5 y                   | 142 (50%)       |          | 332 (61%)         |           | 134%        |               |
|                            | 6-10 y                  | 18 (6%)         |          | 29 (5%)           |           | 61%         |               |
|                            | 11-15 y                 | 4 (1%)          |          | 15 (3%)           |           | 275%        |               |
|                            | 16-20 y                 | 15 (5%)         |          | 30 (6%)           |           | 100%        |               |
|                            | 21-50 y                 | 92 (32%)        |          | 104 (19%)         |           | 13%         |               |
|                            | >50 y                   | 14 (5%)         |          | 34 (6%)           |           | 143%        |               |
| Gender Variation           |                         | Male            | Female   | Male              | Female    | Male % of Δ | Female % of Δ |
|                            | Drugs                   | 84 (51%)        | 57 (48%) | 198 (64%)         | 123 (53%) | 136%        | 116%          |
|                            | Pesticides              | 10 (6%)         | 10 (8%)  | 9 (3%)            | 11 (5%)   | -10%        | 10%           |
|                            | Toxic Plants            | 2 (1%)          | 0 (0%)   | 0 (0%)            | 1 (0%)    | -100%       | NA            |
|                            | Scorpion stings         | 6 (4%)          | 5 (4%)   | 4 (1%)            | 1 (0%)    | -33%        | -80%          |
|                            | Snake bites             | 4 (2%)          | 1 (1%)   | 0 (0%)            | 0 (0%)    | -100%       | -100%         |
| Insect bites               | 11 (7%)                 | 3 (3%)          | 6 (2%)   | 9 (4%)            | -45%      | 200%        |               |

|                                                                                                                                                                                                                                                                                                                                                                                                                                                                                                                                                                                                                                                                                                                             |                          |                           |          |                            |          |             |             |
|-----------------------------------------------------------------------------------------------------------------------------------------------------------------------------------------------------------------------------------------------------------------------------------------------------------------------------------------------------------------------------------------------------------------------------------------------------------------------------------------------------------------------------------------------------------------------------------------------------------------------------------------------------------------------------------------------------------------------------|--------------------------|---------------------------|----------|----------------------------|----------|-------------|-------------|
|                                                                                                                                                                                                                                                                                                                                                                                                                                                                                                                                                                                                                                                                                                                             | Toxic Gases (chlorine)   | 1 (1%)                    | 1 (1%)   | 4 (1%)                     | 4 (2%)   | <b>300%</b> | <b>300%</b> |
|                                                                                                                                                                                                                                                                                                                                                                                                                                                                                                                                                                                                                                                                                                                             | Heavy Metals             | 4 (2%)                    | 5 (4%)   | 6 (2%)                     | 6 (3%)   | <b>50%</b>  | <b>20%</b>  |
|                                                                                                                                                                                                                                                                                                                                                                                                                                                                                                                                                                                                                                                                                                                             | Household Cleaners       | 14 (8%)                   | 18 (15%) | 47 (15%)                   | 36 (15%) | <b>236%</b> | <b>100%</b> |
|                                                                                                                                                                                                                                                                                                                                                                                                                                                                                                                                                                                                                                                                                                                             | Hydrocarbons             | 10 (6%)                   | 6 (5%)   | 11(4%)                     | 6 (3%)   | <b>10%</b>  | <b>0%</b>   |
|                                                                                                                                                                                                                                                                                                                                                                                                                                                                                                                                                                                                                                                                                                                             | Domestic Animals bites   | 4 (2%)                    | 0 (0%)   | 7 (2%)                     | 4 (2%)   | <b>75%</b>  | <b>NA</b>   |
|                                                                                                                                                                                                                                                                                                                                                                                                                                                                                                                                                                                                                                                                                                                             | Food                     | 10 (6%)                   | 7 (6%)   | 5 (2%)                     | 9 (4%)   | <b>-50%</b> | <b>29%</b>  |
|                                                                                                                                                                                                                                                                                                                                                                                                                                                                                                                                                                                                                                                                                                                             | Alcohol                  | 5 (3%)                    | 7 (6%)   | 13 (4%)                    | 24 (10%) | <b>160%</b> | <b>243%</b> |
| <b>Source of Calls</b>                                                                                                                                                                                                                                                                                                                                                                                                                                                                                                                                                                                                                                                                                                      |                          |                           |          |                            |          |             |             |
|                                                                                                                                                                                                                                                                                                                                                                                                                                                                                                                                                                                                                                                                                                                             | General public           | 93 (33%)                  |          | 156 (29%)                  |          | <b>68%</b>  |             |
|                                                                                                                                                                                                                                                                                                                                                                                                                                                                                                                                                                                                                                                                                                                             | Emergency Services (911) | 108 (38%)                 |          | 292 (54%)                  |          | <b>170%</b> |             |
|                                                                                                                                                                                                                                                                                                                                                                                                                                                                                                                                                                                                                                                                                                                             | Health Care Workers      | 84 (29%)                  |          | 96 (18%)                   |          | <b>14%</b>  |             |
| <b>Medical Outcome Based on PSS*</b>                                                                                                                                                                                                                                                                                                                                                                                                                                                                                                                                                                                                                                                                                        |                          |                           |          |                            |          |             |             |
|                                                                                                                                                                                                                                                                                                                                                                                                                                                                                                                                                                                                                                                                                                                             | Non (No effect)          | 26 (9%)                   |          | 201 (37%)                  |          | <b>673%</b> |             |
|                                                                                                                                                                                                                                                                                                                                                                                                                                                                                                                                                                                                                                                                                                                             | minor                    | 95 (33%)                  |          | 228 (42%)                  |          | <b>140%</b> |             |
|                                                                                                                                                                                                                                                                                                                                                                                                                                                                                                                                                                                                                                                                                                                             | Moderate                 | 131 (46%)                 |          | 90 (17%)                   |          | <b>-31%</b> |             |
|                                                                                                                                                                                                                                                                                                                                                                                                                                                                                                                                                                                                                                                                                                                             | Severe                   | 33 (12%)                  |          | 25 (5%)                    |          | <b>-24%</b> |             |
|                                                                                                                                                                                                                                                                                                                                                                                                                                                                                                                                                                                                                                                                                                                             | Death                    | 0 (0%)                    |          | 0 (0%)                     |          | <b>0%</b>   |             |
| <b>Hospital Admissions</b>                                                                                                                                                                                                                                                                                                                                                                                                                                                                                                                                                                                                                                                                                                  |                          |                           |          |                            |          |             |             |
|                                                                                                                                                                                                                                                                                                                                                                                                                                                                                                                                                                                                                                                                                                                             | Number of Admissions     | 15 (5%)                   |          | 54 (10%)                   |          | <b>260%</b> |             |
|                                                                                                                                                                                                                                                                                                                                                                                                                                                                                                                                                                                                                                                                                                                             | Children from 0-5 Years  | 7 (47%)                   |          | 30 (56%)                   |          | <b>329%</b> |             |
| <b>Emergency Services Dispatch</b>                                                                                                                                                                                                                                                                                                                                                                                                                                                                                                                                                                                                                                                                                          |                          |                           |          |                            |          |             |             |
|                                                                                                                                                                                                                                                                                                                                                                                                                                                                                                                                                                                                                                                                                                                             |                          | 80 out of 108 cases (74%) |          | 119 out of 292 cases (41%) |          | <b>-33%</b> |             |
| * Household cleaners: Products containing (ammonia, hydrochloric acid, sodium hypochlorite, or alkaline cleaning products - Drain and oven cleaners...etc). Alcohol: ethanol-based cleaning solutions, hand sanitizers or pure ethanol as spray (not for intake). Hydrocarbons: mainly paint thinners and kerosene. Domestic Animals Bites: from dogs, cats, and hamsters. Toxic gases: inhaled chlorine. Other routes of exposure: include rectal and unknown routes. Medical Consultation: only reported consultations without reports of toxicity. Therapeutic reasons: include incidents reported as side effects of medication and drugs. NA: not applicable (mathematical causes), PSS: Poison Severity Score. n (n%) |                          |                           |          |                            |          |             |             |

## Figures Legend:

### Figure1: Class of Exposure

*This chart shows the difference in classes of exposure when comparing the period of 2019 to COVID-19 lockdown.*

### Figure2: Route of Exposure

This chart shows changes in routes of exposure in both studied periods.

### Figure3: Site of Exposure

In this chart, changes in sites of exposure are shown.

### Figure4: Reason of Exposure

1  
2  
3 Reasons for exposure for both periods are set side by side, showing variance.  
4  
5  
6

#### 7 Figure5: Gender Variation 8

9  
10 This chart shows the prevalence of toxic exposures across different age groups.  
11  
12  
13  
14

#### 15 Figure6: Distribution Across Age Groups 16

17  
18 In this chart, a correlation between different exposure classes and gender is highlighted  
19  
20  
21  
22  
23

#### 24 Figure7: Source of Calls 25

26  
27 This chart shows the difference in the source of calls in both studied periods.  
28  
29  
30

#### 31 Figure8: Medical Outcome Including Admission 32

33  
34 Changes in medical outcomes are shown in this chart. It also includes changes in the percentage of admissions and  
35 percentage of children admitted during both periods  
36  
37  
38  
39  
40  
41  
42  
43  
44  
45  
46  
47  
48  
49  
50  
51  
52  
53  
54  
55  
56  
57  
58  
59  
60

1  
2  
3  
4  
5  
6  
7  
8  
9  
10  
11  
12  
13  
14  
15  
16  
17  
18  
19  
20  
21  
22  
23  
24  
25  
26  
27  
28  
29  
30  
31  
32  
33  
34  
35  
36  
37  
38  
39  
40  
41  
42  
43  
44  
45  
46  
47  
48  
49  
50  
51  
52  
53  
54  
55  
56  
57  
58  
59  
60

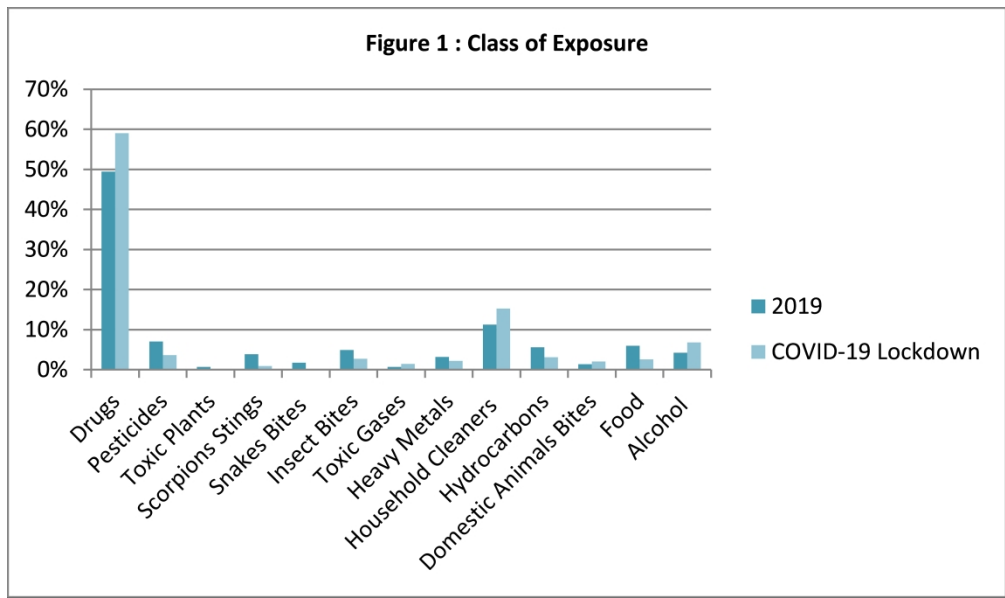

139x82mm (1200 x 1200 DPI)



1  
2  
3  
4  
5  
6  
7  
8  
9  
10  
11  
12  
13  
14  
15  
16  
17  
18  
19  
20  
21  
22  
23  
24  
25  
26  
27  
28  
29  
30  
31  
32  
33  
34  
35  
36  
37  
38  
39  
40  
41  
42  
43  
44  
45  
46  
47  
48  
49  
50  
51  
52  
53  
54  
55  
56  
57  
58  
59  
60

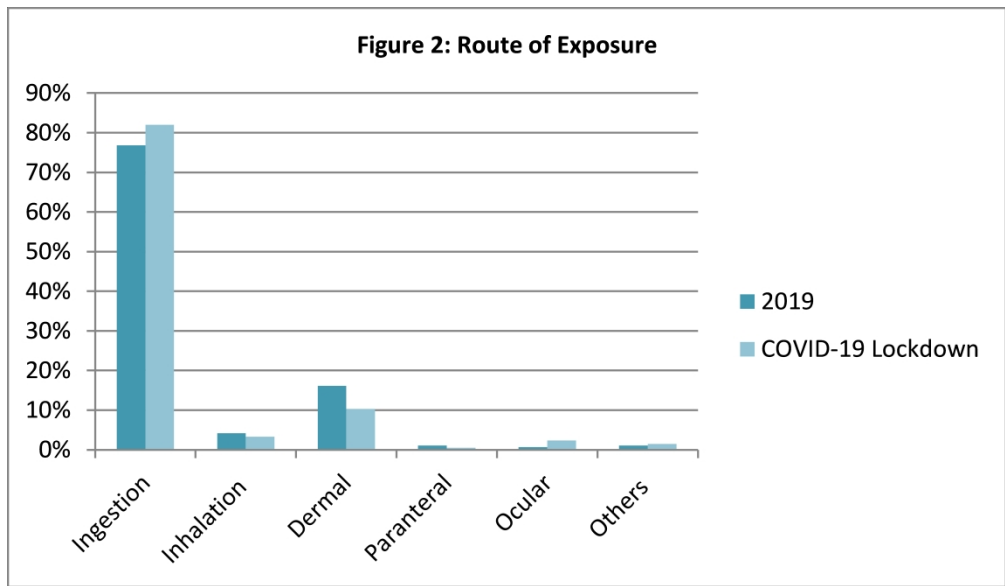

133x77mm (1200 x 1200 DPI)

1  
2  
3  
4  
5  
6  
7  
8  
9  
10  
11  
12  
13  
14  
15  
16  
17  
18  
19  
20  
21  
22  
23  
24  
25  
26  
27  
28  
29  
30  
31  
32  
33  
34  
35  
36  
37  
38  
39  
40  
41  
42  
43  
44  
45  
46  
47  
48  
49  
50  
51  
52  
53  
54  
55  
56  
57  
58  
59  
60

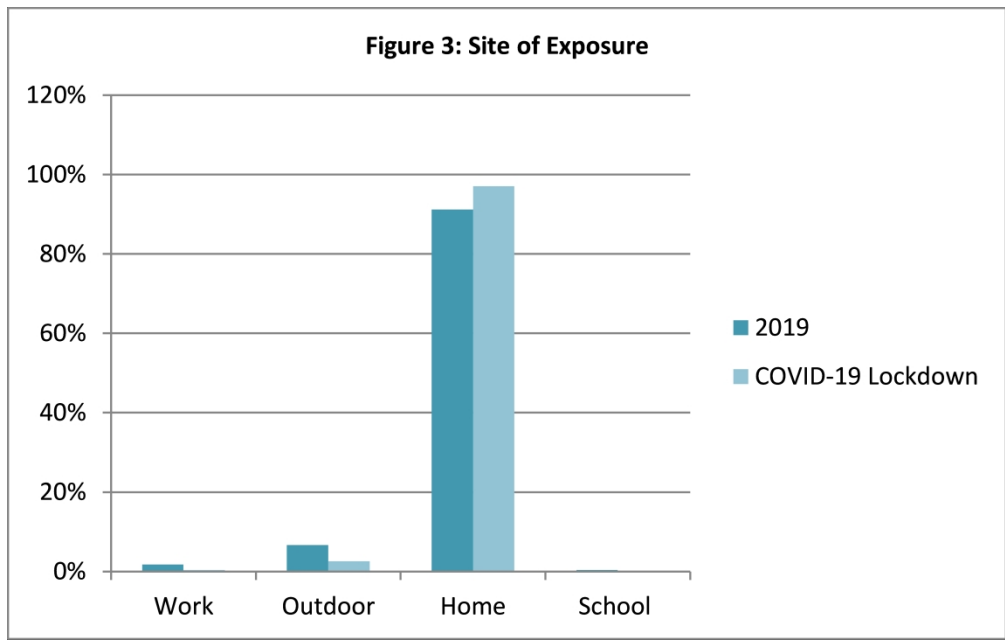

130x82mm (1200 x 1200 DPI)

1  
2  
3  
4  
5  
6  
7  
8  
9  
10  
11  
12  
13  
14  
15  
16  
17  
18  
19  
20  
21  
22  
23  
24  
25  
26  
27  
28  
29  
30  
31  
32  
33  
34  
35  
36  
37  
38  
39  
40  
41  
42  
43  
44  
45  
46  
47  
48  
49  
50  
51  
52  
53  
54  
55  
56  
57  
58  
59  
60

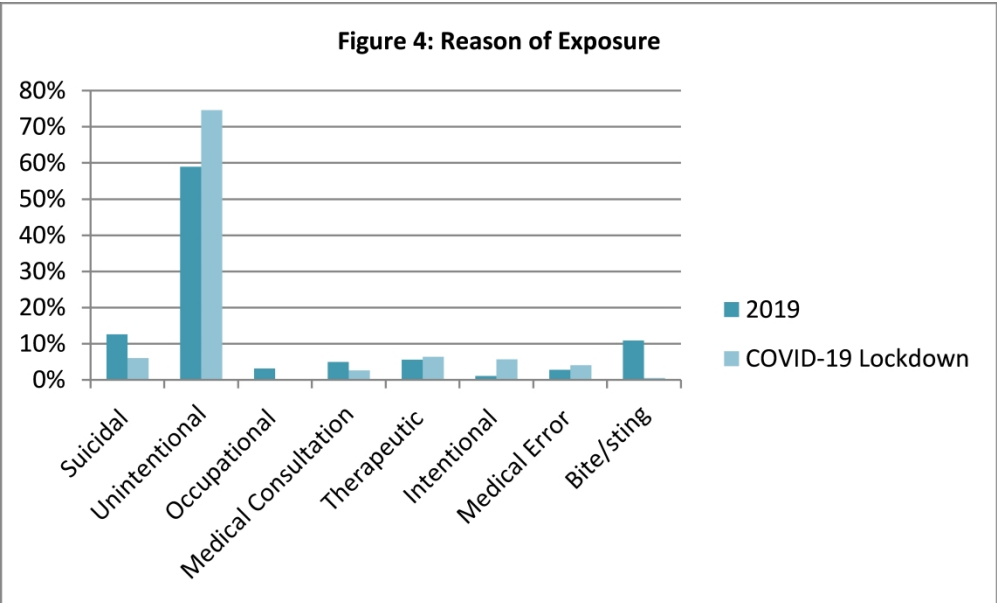

129x78mm (1200 x 1200 DPI)

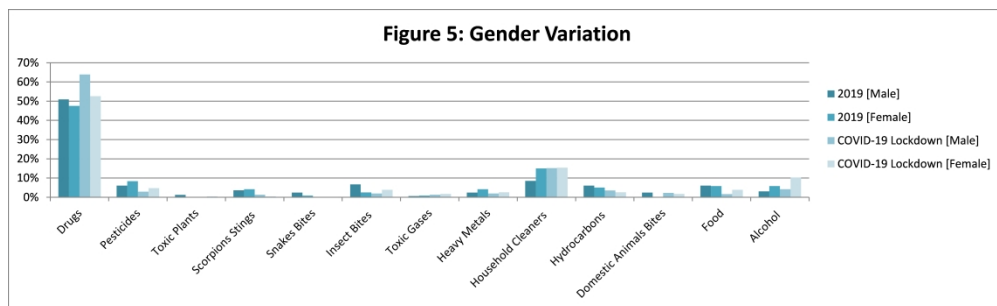

277x84mm (600 x 600 DPI)

1  
2  
3  
4  
5  
6  
7  
8  
9  
10  
11  
12  
13  
14  
15  
16  
17  
18  
19  
20  
21  
22  
23  
24  
25  
26  
27  
28  
29  
30  
31  
32  
33  
34  
35  
36  
37  
38  
39  
40  
41  
42  
43  
44  
45  
46  
47  
48  
49  
50  
51  
52  
53  
54  
55  
56  
57  
58  
59  
60

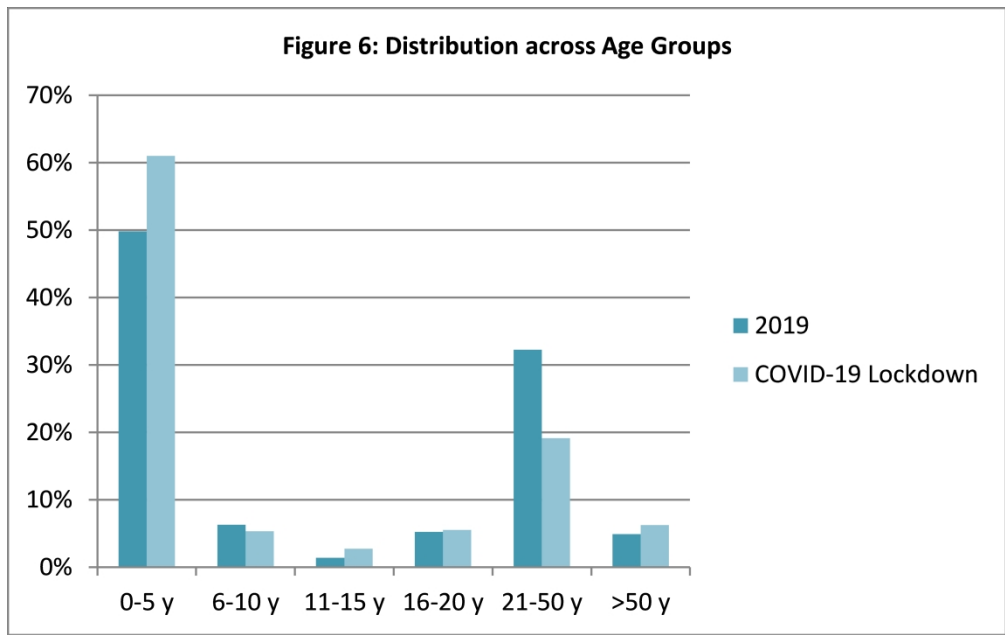

130x81mm (1200 x 1200 DPI)

1  
2  
3  
4  
5  
6  
7  
8  
9  
10  
11  
12  
13  
14  
15  
16  
17  
18  
19  
20  
21  
22  
23  
24  
25  
26  
27  
28  
29  
30  
31  
32  
33  
34  
35  
36  
37  
38  
39  
40  
41  
42  
43  
44  
45  
46  
47  
48  
49  
50  
51  
52  
53  
54  
55  
56  
57  
58  
59  
60

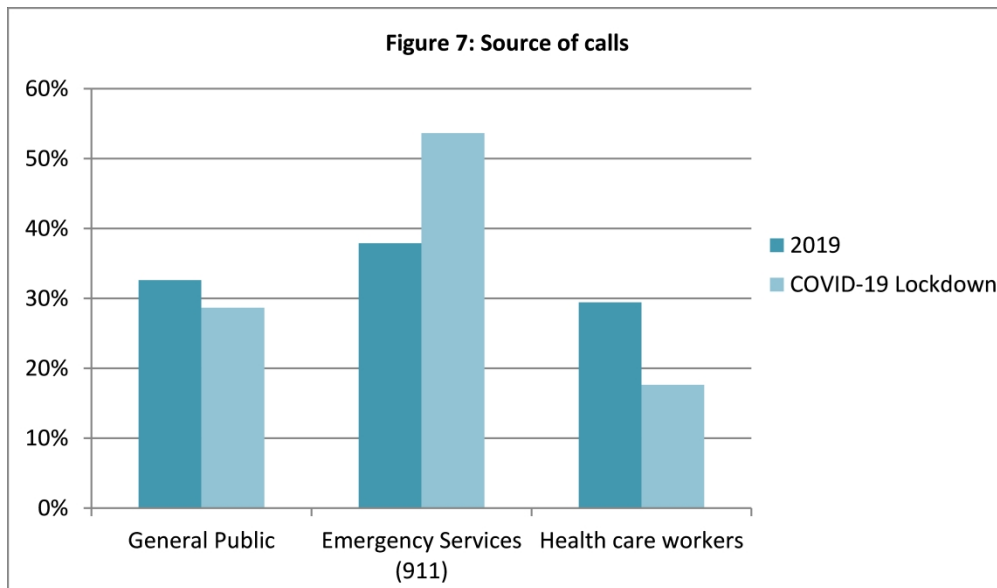

140x82mm (1200 x 1200 DPI)

1  
2  
3  
4  
5  
6  
7  
8  
9  
10  
11  
12  
13  
14  
15  
16  
17  
18  
19  
20  
21  
22  
23  
24  
25  
26  
27  
28  
29  
30  
31  
32  
33  
34  
35  
36  
37  
38  
39  
40  
41  
42  
43  
44  
45  
46  
47  
48  
49  
50  
51  
52  
53  
54  
55  
56  
57  
58  
59  
60

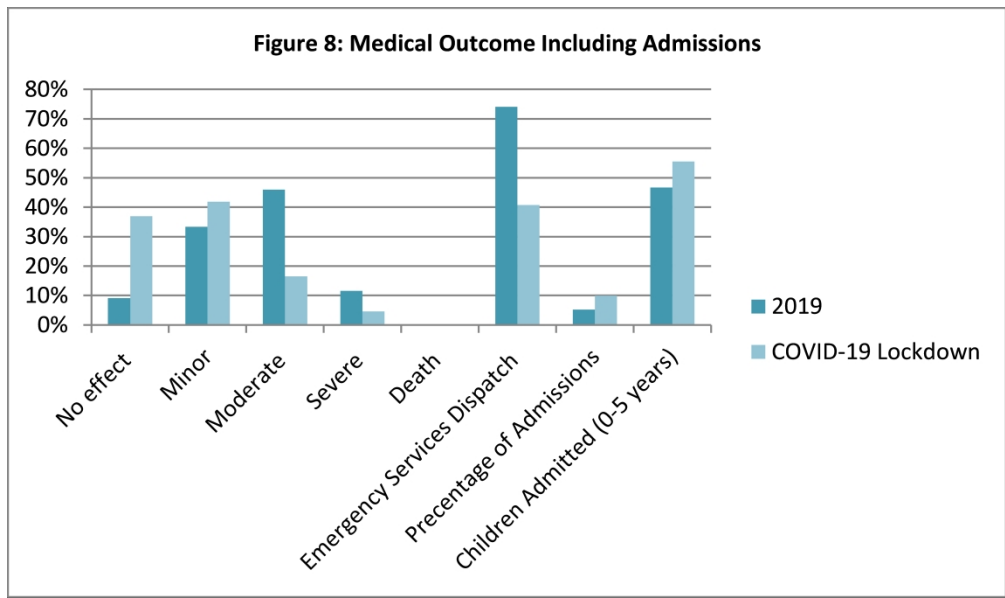

139x82mm (1200 x 1200 DPI)

## STROBE Statement—checklist of items that should be included in reports of observational studies

|                           | Item No | Recommendation                                                                                                                                                                             | Page No |
|---------------------------|---------|--------------------------------------------------------------------------------------------------------------------------------------------------------------------------------------------|---------|
| <b>Title and abstract</b> | 1       | (a) Indicate the study's design with a commonly used term in the title or the abstract                                                                                                     | 1,4     |
|                           |         | (b) Provide in the abstract an informative and balanced summary of what was done and what was found                                                                                        | 2       |
| <b>Introduction</b>       |         |                                                                                                                                                                                            |         |
| Background/rationale      | 2       | Explain the scientific background and rationale for the investigation being reported                                                                                                       | 5-6     |
| Objectives                | 3       | State specific objectives, including any prespecified hypotheses                                                                                                                           | 6       |
| <b>Methods</b>            |         |                                                                                                                                                                                            |         |
| Study design              | 4       | Present key elements of study design early in the paper                                                                                                                                    | 2,4     |
| Setting                   | 5       | Describe the setting, locations, and relevant dates, including periods of recruitment, exposure, follow-up, and data collection                                                            | 4-5     |
| Participants              | 6       | (a) <i>Cohort study</i> —Give the eligibility criteria, and the sources and methods of selection of participants. Describe methods of follow-up                                            | -       |
|                           |         | <i>Case-control study</i> —Give the eligibility criteria, and the sources and methods of case ascertainment and control selection. Give the rationale for the choice of cases and controls | -       |
|                           |         | <i>Cross-sectional study</i> —Give the eligibility criteria, and the sources and methods of selection of participants                                                                      | 4       |
|                           |         | (b) <i>Cohort study</i> —For matched studies, give matching criteria and number of exposed and unexposed                                                                                   | -       |
|                           |         | <i>Case-control study</i> —For matched studies, give matching criteria and the number of controls per case                                                                                 | -       |
| Variables                 | 7       | Clearly define all outcomes, exposures, predictors, potential confounders, and effect modifiers. Give diagnostic criteria, if applicable                                                   | 5       |
| Data sources/measurement  | 8*      | For each variable of interest, give sources of data and details of methods of assessment (measurement). Describe comparability of assessment methods if there is more than one group       | 4       |
| Bias                      | 9       | Describe any efforts to address potential sources of bias                                                                                                                                  | 4       |
| Study size                | 10      | Explain how the study size was arrived at                                                                                                                                                  | 4       |
| Quantitative variables    | 11      | Explain how quantitative variables were handled in the analyses. If applicable, describe which groupings were chosen and why                                                               | -       |
| Statistical methods       | 12      | (a) Describe all statistical methods, including those used to control for confounding                                                                                                      | -       |
|                           |         | (b) Describe any methods used to examine subgroups and interactions                                                                                                                        | -       |
|                           |         | (c) Explain how missing data were addressed                                                                                                                                                | -       |
|                           |         | (d) <i>Cohort study</i> —If applicable, explain how loss to follow-up was addressed                                                                                                        | -       |
|                           |         | <i>Case-control study</i> —If applicable, explain how matching of cases and controls was addressed                                                                                         | -       |
|                           |         | <i>Cross-sectional study</i> —If applicable, describe analytical methods taking account of sampling strategy                                                                               | 4       |
|                           |         | (e) Describe any sensitivity analyses                                                                                                                                                      |         |

Continued on next page



1  
2  
3  
4  
5  
6  
7  
8  
9  
10  
11  
12  
13  
14  
15  
16  
17  
18  
19  
20  
21  
22  
23  
24  
25  
26  
27  
28  
29  
30  
31  
32  
33  
34  
35  
36  
37  
38  
39  
40  
41  
42  
43  
44  
45  
46  
47  
48  
49  
50  
51  
52  
53  
54  
55  
56  
57  
58  
59  
60

| <b>Results</b>           |     |                                                                                                                                                                                                              |      |
|--------------------------|-----|--------------------------------------------------------------------------------------------------------------------------------------------------------------------------------------------------------------|------|
| Participants             | 13* | (a) Report numbers of individuals at each stage of study—eg numbers potentially eligible, examined for eligibility, confirmed eligible, included in the study, completing follow-up, and analysed            | -    |
|                          |     | (b) Give reasons for non-participation at each stage                                                                                                                                                         | -    |
|                          |     | (c) Consider use of a flow diagram                                                                                                                                                                           | -    |
| Descriptive data         | 14* | (a) Give characteristics of study participants (eg demographic, clinical, social) and information on exposures and potential confounders                                                                     | 7-9  |
|                          |     | (b) Indicate number of participants with missing data for each variable of interest                                                                                                                          | -    |
|                          |     | (c) <i>Cohort study</i> —Summarise follow-up time (eg, average and total amount)                                                                                                                             | -    |
| Outcome data             | 15* | <i>Cohort study</i> —Report numbers of outcome events or summary measures over time                                                                                                                          | -    |
|                          |     | <i>Case-control study</i> —Report numbers in each exposure category, or summary measures of exposure                                                                                                         | -    |
|                          |     | <i>Cross-sectional study</i> —Report numbers of outcome events or summary measures                                                                                                                           | 8,9  |
| Main results             | 16  | (a) Give unadjusted estimates and, if applicable, confounder-adjusted estimates and their precision (eg, 95% confidence interval). Make clear which confounders were adjusted for and why they were included | 8,9  |
|                          |     | (b) Report category boundaries when continuous variables were categorized                                                                                                                                    | -    |
|                          |     | (c) If relevant, consider translating estimates of relative risk into absolute risk for a meaningful time period                                                                                             | -    |
| Other analyses           | 17  | Report other analyses done—eg analyses of subgroups and interactions, and sensitivity analyses                                                                                                               | -    |
| <b>Discussion</b>        |     |                                                                                                                                                                                                              |      |
| Key results              | 18  | Summarise key results with reference to study objectives                                                                                                                                                     | 9    |
| Limitations              | 19  | Discuss limitations of the study, taking into account sources of potential bias or imprecision. Discuss both direction and magnitude of any potential bias                                                   | 12   |
| Interpretation           | 20  | Give a cautious overall interpretation of results considering objectives, limitations, multiplicity of analyses, results from similar studies, and other relevant evidence                                   | 9-11 |
| Generalisability         | 21  | Discuss the generalisability (external validity) of the study results                                                                                                                                        | 13   |
| <b>Other information</b> |     |                                                                                                                                                                                                              |      |
| Funding                  | 22  | Give the source of funding and the role of the funders for the present study and, if applicable, for the original study on which the present article is based                                                | 13   |

\*Give information separately for cases and controls in case-control studies and, if applicable, for exposed and unexposed groups in cohort and cross-sectional studies.

**Note:** An Explanation and Elaboration article discusses each checklist item and gives methodological background and published examples of transparent reporting. The STROBE checklist is best used in conjunction with this article (freely available on the Web sites of PLoS Medicine at <http://www.plosmedicine.org/>, Annals of Internal Medicine at <http://www.annals.org/>, and Epidemiology at <http://www.epidem.com/>). Information on the STROBE Initiative is available at [www.strobe-statement.org](http://www.strobe-statement.org).

# BMJ Open

## Impact of COVID-19 Lockdown on the Incidence and Patterns of Toxic Exposures and Poisoning in Jordan; A Retrospective Descriptive Study

|                                 |                                                                                                                                                                                                                                                                                                                                                                                                                                                                                                                                                                                                                              |
|---------------------------------|------------------------------------------------------------------------------------------------------------------------------------------------------------------------------------------------------------------------------------------------------------------------------------------------------------------------------------------------------------------------------------------------------------------------------------------------------------------------------------------------------------------------------------------------------------------------------------------------------------------------------|
| Journal:                        | <i>BMJ Open</i>                                                                                                                                                                                                                                                                                                                                                                                                                                                                                                                                                                                                              |
| Manuscript ID                   | bmjopen-2021-053028.R1                                                                                                                                                                                                                                                                                                                                                                                                                                                                                                                                                                                                       |
| Article Type:                   | Original research                                                                                                                                                                                                                                                                                                                                                                                                                                                                                                                                                                                                            |
| Date Submitted by the Author:   | 16-Sep-2021                                                                                                                                                                                                                                                                                                                                                                                                                                                                                                                                                                                                                  |
| Complete List of Authors:       | Raffee , Liqaa ; Jordan University of Science and Technology, Accidents and Emergency<br>Daradkeh, Hamza; King Abdullah University Hospital, Accidents and Emergency<br>Alawneh, Khaled ; Jordan University of Science and Technology, Diagnostic Radiology and Nuclear Medicine<br>Al – Fwadleh, Aida; Pharmacy One Poison Center, Administration<br>Darweesh, Moath; Jordan University of Science and Technology, Accident and Emergency<br>Hammad, Nouran; Jordan University of Science and Technology, Accidents and Emergency<br>Almasarweh, Sami; Jordan University of Science and Technology, Accidents and Emergency |
| <b>Primary Subject Heading</b>: | Public health                                                                                                                                                                                                                                                                                                                                                                                                                                                                                                                                                                                                                |
| Secondary Subject Heading:      | Global health, Public health, Emergency medicine, Epidemiology                                                                                                                                                                                                                                                                                                                                                                                                                                                                                                                                                               |
| Keywords:                       | TOXICOLOGY, COVID-19, EPIDEMIOLOGY, ACCIDENT & EMERGENCY MEDICINE, PUBLIC HEALTH                                                                                                                                                                                                                                                                                                                                                                                                                                                                                                                                             |
|                                 |                                                                                                                                                                                                                                                                                                                                                                                                                                                                                                                                                                                                                              |

SCHOLARONE™  
Manuscripts



I, the Submitting Author has the right to grant and does grant on behalf of all authors of the Work (as defined in the below author licence), an exclusive licence and/or a non-exclusive licence for contributions from authors who are: i) UK Crown employees; ii) where BMJ has agreed a CC-BY licence shall apply, and/or iii) in accordance with the terms applicable for US Federal Government officers or employees acting as part of their official duties; on a worldwide, perpetual, irrevocable, royalty-free basis to BMJ Publishing Group Ltd ("BMJ") its licensees and where the relevant Journal is co-owned by BMJ to the co-owners of the Journal, to publish the Work in this journal and any other BMJ products and to exploit all rights, as set out in our [licence](#).

The Submitting Author accepts and understands that any supply made under these terms is made by BMJ to the Submitting Author unless you are acting as an employee on behalf of your employer or a postgraduate student of an affiliated institution which is paying any applicable article publishing charge ("APC") for Open Access articles. Where the Submitting Author wishes to make the Work available on an Open Access basis (and intends to pay the relevant APC), the terms of reuse of such Open Access shall be governed by a Creative Commons licence – details of these licences and which [Creative Commons](#) licence will apply to this Work are set out in our licence referred to above.

Other than as permitted in any relevant BMJ Author's Self Archiving Policies, I confirm this Work has not been accepted for publication elsewhere, is not being considered for publication elsewhere and does not duplicate material already published. I confirm all authors consent to publication of this Work and authorise the granting of this licence.

1  
2  
3  
4  
5  
6  
7  
8  
9  
10  
11  
12  
13  
14  
15  
16  
17  
18  
19  
20  
21  
22  
23  
24  
25  
26  
27  
28  
29  
30  
31  
32  
33  
34  
35  
36  
37  
38  
39  
40  
41  
42  
43  
44  
45  
46  
47  
48  
49  
50  
51  
52  
53  
54  
55  
56  
57  
58  
59  
60

## Impact of COVID-19 Lockdown on the Incidence and Patterns of Toxic Exposures and Poisoning in Jordan; A Retrospective Descriptive Study

Liqa A. Raffee<sup>1</sup>, Hamza Daradkeh<sup>2</sup>, Khaled Z. Alawneh<sup>1</sup>, Aida I. Al – Fwadleh<sup>3</sup>, Moath N. Darweesh<sup>1</sup>, Nouran H. Hammad<sup>1</sup>, Sami A. Almasarweh<sup>1</sup>

<sup>1</sup> Jordan University of Science and Technology (J.U.S.T)

<sup>2</sup> King Abdullah University Hospital (affiliated to J.U.S.T).

<sup>3</sup> Pharmacy One™ Poison Center

For any correspondence on this article, please notify the corresponding author, Dr. Liqa A. Raffee, Head of Accidents and Emergency department, Jordan University of Science and Technology, Jordan – Irbid, Email: [laraffee5@just.edu.jo](mailto:laraffee5@just.edu.jo) , Phone: 00962795313555

**Abstract:**

Objectives: To describe the effect of the COVID-19 lockdown in Jordan (March 21, 2020 – May 21, 2020) on the incidence and patterns of toxic exposures and poisoning as compared to the same period from the previous year (March 21, 2019 – May 21, 2019).

Design: A retrospective descriptive study.

Methods: Call data sourced from Pharmacy One™ Poison Center from the lockdown period (March 21, 2020, to May 21, 2020) and the same period during 2019 (March 21, 2019 to May 21, 2019) was revised. In addition, a database was established and analyzed.

Results: We noticed that not only did calls increased, but there was also a noticeable change in call patterns. Calls increased by 91% (544 versus 285 calls) during the lockdown period. Drugs were the most common among types of exposure, and the most prevalent route of exposure was ingestion. There was a notable increase in ocular exposure by 550% (13 versus 2 cases). The majority of exposures were at home and there were no occupational exposures. We found an increase in household cleaner's exposure among males and an increase in alcohol exposure in females. Children aged below five years are the most affected. Even though there is an increase in the total number of cases, severe cases decreased.

Conclusion: The lockdown effect on rates of toxic exposures was prominent, whether through the increase in calls or the change in patterns. As people spent more time at home, their exposure to toxic agents increased. Furthermore, cleaning recommendations led to the misuse of cleaning and disinfectant products, increasing exposures related to abating the COVID-19 infection.

Key words: COVID-19, Lockdown, Toxic Exposures, Poisoning, Poison Control Center.

### Article Summary:

- 1- The exposure patterns during COVID-19 lockdown.
- 2- The COVID-19 lockdown effect on the numbers and patterns of exposures.
- 3- It highlights specific exposures related to COVID-19 infection control efforts, management protocols, or self-medication.
- 4- It highlights the important role poison control centers could play during crises.
- 5- Information presented in this study can be taken in consideration while planning healthcare policies.

### Strengths and Limitations of the study:

- 1) This study addresses different aspects of toxic exposures during the lockdown.
- 2) Our data represent the majority of calls related to toxic exposures in Jordan.
- 3) Not all exposures were reported to the poison center.
- 4) Poisoning specialists base their judgment and recommendations for management on the caller's information
- 5) It was not possible to access data from other poison centers in the country

More details on strength and limitations were provided in the discussion section.

1  
2  
3 **Title: Impact of COVID-19 Lockdown on the Incidence and Patterns of Toxic Exposures**  
4 **and Poisoning in Jordan; A Retrospective Descriptive Study.**  
5  
6

7  
8 **Objectives:** To describe the effect of the COVID-19 lockdown in Jordan (March 21, 2020 –  
9 May 21, 2020) on the incidence and patterns of toxic exposures and poisoning as compared to  
10 the same period from the previous year (March 21, 2019 – May 21, 2019).  
11  
12  
13

14  
15  
16 **Design:** A retrospective descriptive study.  
17  
18

19 **Introduction:** Coronavirus Disease 2019 (COVID-19) caused by the novel Coronavirus (SARS-  
20 CoV-2) was first reported in Wuhan, China in December of 2019 [1]. The World Health  
21 Organization (WHO) characterized the disease as a pandemic on March 11, 2020 [2]. The rapid  
22 increase in the number of cases and deaths, along with the lack of vaccines and effective medical  
23 therapy; in the early course of the pandemic, has led to a global emergency response [3, 4]. Many  
24 countries adopted classical public health measures including, isolation and quarantine, social  
25 distancing, and community containment to slow down the spread of SARS-CoV-2 virus [4-7]. In  
26 the initial stages of the pandemic, lack of adequate information on the most effective prevention  
27 and treatment strategies allowed the spread of misinformation and resulted in the improper use of  
28 drugs, chemicals, and traditional remedies for their presumed protective or therapeutic roles even  
29 though many of these substances are known for their harmful and toxic effects [8-12].  
30  
31  
32  
33  
34  
35  
36  
37  
38  
39  
40  
41  
42  
43  
44

45  
46  
47  
48  
49  
50  
51  
52  
53  
54  
55  
56  
57  
58  
59  
60  
Poison centers from the United States, Canada, and France reported a spike in calls related to  
toxic exposures during the COVID-19 lockdown [13-16]. Reported exposures included the  
improper use of medications, self-medication, and household chemicals [17-19]. However, the  
majority of the reported exposures were related to hand sanitizers, disinfectants, household  
cleaners, alcohol, and drugs supposed to be effective in COVID-19 treatment protocols [20-22].

1  
2  
3 The first case of COVID-19 in Jordan was confirmed on March 2, 2020. The Jordanian  
4 government announced a national lockdown that came into effect on March 21, 2020 and  
5 continued through to May 21, 2020. During this lockdown, there was a stay-at-home order with  
6 the suspension of all social, religious, and work activities except for a few-hours window period  
7 each day allowing people to buy their essential goods [23]. We conducted this study to evaluate  
8 if the lockdown has led to any change in the incidence or pattern of toxic exposures or poisoning  
9 in Jordan, especially those associated with cleaners, hand sanitizers, and alcohol. This study will  
10 analyze the patterns of toxic exposures and poisoning among the Jordanian population during the  
11 COVID-19 lockdown as compared with the exact period of the previous year.  
12  
13  
14  
15  
16  
17  
18  
19  
20  
21  
22  
23  
24  
25  
26  
27

### 28 **Methods:**

29  
30  
31 *Data source:* There are three poison centers in Jordan; Jordanian Royal Medical Services  
32 (JRMS) Poison Center, Jordan University Hospital Poison Center; and Pharmacy One™ Poison  
33 Center. Each of these centers works independently and there is no central reporting system. All  
34 three centers receive calls directly from healthcare workers and the public; however, Pharmacy  
35 One™ Poison Center is the only one responsible for receiving calls related to poisoning from the  
36 Civil Defense Directorate (CDD), the primary emergency response service in Jordan (911). The  
37 directorate is compelled by the law to report poisoning incidences to the poison center as soon as  
38 the command center receives the report, and reporting is near real-time. Therefore, we decided to  
39 study data from the Pharmacy One™ Poison Center because it is the only one responsible for  
40 responding to the CDD calls.  
41  
42  
43  
44  
45  
46  
47  
48  
49  
50  
51  
52  
53  
54  
55  
56  
57  
58  
59  
60



1  
2  
3 Pharmacy One™ Poison Center is a large non-profit national poison center that receives  
4 unrestricted calls from the public, healthcare workers, and CDD calls (911), runs for 24 hours per  
5 day, over seven days a week, and provides free professional advice and management information  
6 regarding toxic exposures and poisoning.  
7  
8  
9  
10

11  
12  
13 *Poisoning Reporting System:* Cases are reported to the poison center through the direct hotline or  
14 directed via the CDD command center. Poison center specialists will respond to the caller over  
15 the phone. Information about the patient demographics such as age, gender, residence,  
16 information about the poisoning incident (time of exposure, involved agent, single or multiple  
17 agents, dose, site, route), and the nature of symptoms, if found, were collected using open direct  
18 questions, and data directly transformed into a preformed database. Based on the American  
19 Association of Poison Control Centers (AAPCC) guidelines, Poisoning cases are categorized into  
20 drugs, hydrocarbons, pesticides, gases, household products, heavy metals, bites, and stings  
21 (insects, scorpions, snakes), and plants or foods exposures [24]. Severity is classified into five  
22 classes based on Poisoning Severity Score (PSS) described by Persson and colleagues [25].  
23 Grade 0, 1 include patients who develop either no or mild symptoms of poisoning (nontoxic  
24 exposures, subtoxic exposures, asymptomatic exposures, or prolonged time after exposure > 24 h  
25 with no signs or symptoms) are advised for home observation or symptomatic home treatment.  
26 Grade 2, 3, 4 includes patients who develop moderate to severe symptoms or die (exposures with  
27 a known toxic agent, patients who developed moderate to severe symptoms, exposures exceeding  
28 safe doses) are directed to the hospital. Clinical information and advice about poisonous agents,  
29 safe doses, first aid actions, and home treatment protocols are obtained from the  
30 MICROMEDEX POISINDEX® toxicology information database and in-house databases  
31  
32  
33  
34  
35  
36  
37  
38  
39  
40  
41  
42  
43  
44  
45  
46  
47  
48  
49  
50  
51  
52  
53  
54  
55  
56  
57  
58  
59  
60

1  
2  
3 containing information about prevalent poisonous agents accounting for poisoning in our country  
4  
5 [26].  
6  
7

8  
9 *Data collection:* The electronic records of Pharmacy One™ Poison Center were revised for the  
10 period (March 21, 2020, to May 21, 2020). All calls related to toxic exposures or poisoning were  
11 included. In addition, all calls for the same period during 2019 (March 21, 2019, to May 21,  
12 2019) were included. For each case, data about the call source (general public, healthcare  
13 worker, or CDD calls (911)), demographic data (age, gender), data about exposure (type, site,  
14 route, and reason of exposure), and medical outcome were collected. The medical outcome was  
15 classified based on Poisoning Severity Score. PSS provides a standardized scale for grading the  
16 severity of acute poisoning based on observed signs and symptoms. We chose to use PSS  
17 because not only is it simple, based on clinical symptoms and signs, but it can also be used for  
18 both children and adults. The classification of poisoning using PSS can be made regardless of the  
19 type and number of toxic agents. It is also possible to prevent underestimation as the severity is  
20 concluded by the most severe symptoms and signs.  
21  
22  
23  
24  
25  
26  
27  
28  
29  
30  
31  
32  
33  
34  
35  
36

37 *Data Analysis:* The database was established using Microsoft Excel 2016. Descriptive analysis,  
38 statistical procedures, and graphs were done using the Data Analysis tool pack, an add-in feature  
39 on Microsoft Excel 2016. Percentages of change in exposure were calculated based on the  
40 following equation:  
41  
42  
43  
44  
45  
46  
47  
48  
49

$$50 \text{ \% of } \Delta = \left( \frac{\text{Percentage during Lockdown} - \text{Percentage during 2019}}{\text{Percentage during 2019}} \right) \times 100\%$$

51  
52  
53  
54  
55  
56  
57  
58  
59  
60

1  
2  
3 According to IRB policy at our institution, this study is exempted from review and approval, as it  
4 is a retrospective review of records, and the personal information has been recorded  
5  
6 anonymously where subjects cannot be identified directly or indirectly, and the investigators do  
7  
8 not need to contact the subjects involved. We also took consent for data collection and records  
9  
10 review.  
11  
12  
13

14  
15 Patient and Public statement: Patients or the public were not involved in the design, conduct,  
16 reporting, or dissemination plans of this study.  
17  
18  
19  
20  
21  
22  
23

## 24 **Results:**

25  
26  
27 During the COVID-19 lockdown from March 21 to May 21, 2020, Pharmacy One™ Poison  
28 Center received a total of 544 calls related to toxic exposures, which represents a 91% increase  
29 in the number of calls during the same period in 2019 (n=285 calls). Drug exposure calls ranked  
30 first with a total of 321 calls (59% of total calls), followed by household cleaners (83 calls, 15%  
31 of total calls), and alcohol exposure (37 cases, 7%). Toxic gases (8 cases, 1%) and toxic plants (1  
32 case, < 1%) were among the least reported exposures. Notably, exposures related to toxic gases,  
33 alcohol, domestic animal bites, household cleaners, and drugs increased by 300%, 208%, 175%,  
34 159%, 128%, respectively, in contrast, exposures related to snake bites, scorpion stings, and  
35 toxic plants decreased by 100%, 55%, 50%, respectively. (Table 1, Figure 1 near here)  
36  
37  
38  
39  
40  
41  
42  
43  
44  
45  
46  
47

48  
49 The most prevalent route of exposure was ingestion with 446 cases (82%), followed by dermal  
50 (56 cases, 10%). Compared to 2019, there was a notable rise in ocular exposures (550% increase;  
51 13 cases in 2020 compared to 2 cases in 2019), ingestion exposures (increased by 104%; 446  
52 cases in 2020 compared to 219 cases in 2019) and inhalational exposures (50% increase; 18  
53  
54  
55  
56  
57  
58  
59  
60

1  
2  
3 cases in 2020 compared to 12 in 2019). (Table 1, figure 2 near here). Most exposures occurred at  
4 home (528 cases, 97%). While home exposures increased by 103%, outdoor, work, and school  
5 exposures decreased by 26%, 60%, 100%, respectively. (Table 1, figure 3 near here)  
6  
7

8  
9  
10 As of the reason and motive of exposure, unintentional exposures in the lockdown constitute  
11 75% of exposures (406 cases), followed by therapeutic, suicidal, and intentional exposures (35  
12 cases, 33 cases, 31 cases, respectively, 6% each). There was a marked increase in intentional  
13 exposures by 933% (3 cases in 2019, 31 cases in lockdown), medical errors by 175% (8 cases in  
14 2019, 22 cases in lockdown), and unintentional exposures by 142% (168 cases in 2019, 406  
15 cases in lockdown). On the other hand, occupational exposures (9 cases in 2019, 0 cases in  
16 lockdown), bites and stings (31 cases in 2019, 3 cases in lockdown), and suicidal exposures (36  
17 cases in 2019, 33 cases in lockdown) decreased by 100%, 90%, 8%, respectively. (Table 1,  
18 figure 4 near here)  
19  
20  
21  
22  
23  
24  
25  
26  
27  
28  
29  
30

31  
32 57% (310 cases) of the exposures occurred in males, and 43% (243 cases) occurred in females.  
33 Males reported more drug exposures. In contrast, females reported more alcohol exposures.  
34 Males reported a drastic increase in exposures related to household cleaners by 236% vs. 100%  
35 increase for females. Females reported an increase in alcohol exposure by 243% vs. 160% for  
36 males. The exposure to toxic gases was the same when comparing genders, both increasing by  
37 300%. (Table 1, figure 5 near here) Exposures were reported in all age groups, with children  
38 from 0-5years being the most affected by 61% of the cases (332 cases). The age group from 11-  
39 15 years reported the sharpest increase in exposures by 275%, followed by age group over 50  
40 years by 143% increase. (Table 1, figure 6 near here)  
41  
42  
43  
44  
45  
46  
47  
48  
49  
50  
51  
52  
53  
54  
55  
56  
57  
58  
59  
60

1  
2  
3 There were 292 (54%) calls from Civil Defenses Directorate [911], 156 (29%) calls from the  
4 general public, and 96 (18%) calls from healthcare workers, with an increase of 170%, 68%, and  
5  
6 14% respectively. (Table 1, figure 7 near here)  
7  
8  
9

10  
11 Lastly, based on the Poisoning Severity Score (PSS), 37% (201 cases) of the cases subsided with  
12 no effects, 42% (228 cases) with minor effects, 17% (90 cases) with moderate effects, 5% (25  
13 cases) with severe effects, and no deaths were reported. 10% (54 cases) needed hospital  
14 admissions. 41% of total emergency service calls were closed only based on poison center  
15 advice, with no reported adverse outcomes. The number of cases resolved with no or minor  
16 effects increased by 673%, 140%, respectively, and those with moderate or severe effects  
17 decreased by 31%, 24%, respectively. The total number of admissions increased by 260% (15  
18 cases in 2019 compared to 54 cases in lockdown), and admissions for children from 0-5 years  
19 increased by 329% (7 cases in 2019 compared to 30 cases in lockdown). The emergency service  
20 dispatch rate decreased by 33%. (Table 1, figure 8 near here)  
21  
22  
23  
24  
25  
26  
27  
28  
29  
30  
31  
32  
33  
34  
35  
36  
37

## 38 **Discussion**

39  
40  
41 Our study showed that lockdown resulted in a 91% increase in calls related to toxic exposures as  
42 well as a pattern change compared to the previous year. Poison centers have also reported similar  
43 results in the United States, Canada, and France [13-15]. We did not find an apparent reason for  
44 such an increase. However, Roux and colleagues suggest a possible explanation for this rise is  
45 the behavioral modifications caused by fear of coronavirus, including excessive house cleaning  
46 and misuse of cleaning products for personal hygiene or food sanitation [16]. Another additional  
47 factor is the decrease in cognitive performance and decision-making induced by isolation  
48  
49  
50  
51  
52  
53  
54  
55  
56  
57  
58  
59  
60

1  
2  
3 measures, combined with an increased impulsivity contributing to such an increase [16]. Chang  
4 and colleagues ascribe such an increase to the cleaning recommendations and guidelines issued  
5  
6 by many health care agencies and social media [13].  
7  
8  
9

10  
11 Our study showed an increase in exposures related to toxic gases, alcohol, household cleaners,  
12  
13 drugs, and domestic animal bites. Toxic gases exposure includes the well-described chlorine gas  
14  
15 that results from mixing bleach and other household chemicals [16]. Notably, guidelines  
16  
17 disseminated in the early days of the pandemic as a part of public infection-control campaigns  
18  
19 have led to the misuse of alcohol-based hand sanitizers and household cleaners [13, 14].  
20  
21

22  
23 Reportedly, disinfectants erroneously used to disinfect vegetables, and alcohol-based hand  
24  
25 sanitizers applied to the whole body resulting in burns, or the use of highly concentrated sodium  
26  
27 hypochlorite are examples of how people falsely interpret these campaigns [16]. Canadian  
28  
29 poison center have also reported similar increases in exposures to bleaches, hand sanitizers,  
30  
31 disinfectants, chlorine and chloramine gas [14].  
32  
33

34  
35 The Jordanian society is mainly conservative, and thereby the use and consumption of drinking  
36  
37 alcohol is limited. As a result, there were no reported cases of poisoning due to drinking alcohol  
38  
39 (ethanol or methanol). However, in countries such as the United States and Russia stockpiling  
40  
41 and consumption of alcohol increased as well as the misuse of alcohol-containing agents [27,  
42  
43 28]. In the United Kingdom, it is predicted to witness a spike in alcohol misuse with frequent  
44  
45 relapses in addicted individuals as the increase in consumption might be related to stress and  
46  
47 impulsivity associated with self-isolation measures [29]. In addition, ingestion of methanol-  
48  
49 containing hand sanitizer has led to the demise of consumers in many countries such as the  
50  
51 United States and Iran [21, 19]. In fact, the numbers of methanol poisoning-related deaths are the  
52  
53 largest in Iran's history as it was more prevalent than COVID-19 related deaths in some Iranian  
54  
55  
56  
57  
58  
59  
60

1  
2  
3 provinces [19]. The spread of misleading messages through social media regarding alcohol use  
4 as a protective agent against COVID-19 and, in the case of Iran, sanctions on alcohol imports are  
5 one of the many reasons for such a spike in methanol consumption [21, 19]. As a result, a  
6 multitude of countries has banned alcohol sale to limit the consequences of alcohol-related health  
7 emergencies on the healthcare system [28].  
8  
9

10 Exposures to drugs in our study were primarily observed in children. A possible explanation for  
11 such an observation is that families stocked drugs anticipating shortages, along with stay-at-  
12 home policy; children spent more time at home, increasing their accidental exposure to such  
13 drugs [16]. This contradicts reports from France, where a fall in drug exposures was noted,  
14 which was linked to the fall in suicidal attempts by drugs [16]. No reported cases of exposures  
15 due to drugs used in COVID-19 treatment. Also, no cases of opioid poisoning or poisoning due  
16 to recreational drugs were reported to our center. However, the global prevalence of the  
17 aforementioned poisoning incidences is conflicting in its nature. The average weekly death rate  
18 increased in Canada by 38% in the first fifteen weeks of COVID-19 compared to the fifteen  
19 weeks before [30]. In the United States, the pandemic has brought a probable surge in adverse  
20 effects related to overdosing [31, 32]. The European Monitoring Centre for Drugs and Drug  
21 Addiction reported 50% decrease in illicit drug use in European countries [33]. Roux et al  
22 reported a decrease in recreational drug use in France, and it was suggested that such a decrease  
23 is due to fewer opportunities to use such drugs, reduced availability of illicit drugs to buy,  
24 reduced ability to collect them, and loss of available income to buy it [16].  
25  
26  
27  
28  
29  
30  
31  
32  
33  
34  
35  
36  
37  
38  
39  
40  
41  
42  
43  
44  
45  
46  
47  
48  
49

50 We noted an increase in bites related to domestic animals. Similarly, Dixon et al. described a  
51 threefold rise in pediatric ER visits due to dog bites during the stay-at-home lockdown policy,  
52 owning such observation to decreased adult supervision over children, and increased dog stress  
53  
54  
55  
56  
57  
58  
59  
60

1  
2  
3 because of confinement [34]. On the other hand, we noticed fewer snake bites, scorpion stings,  
4 toxic plant exposures, and occupational exposures, as home internment and weather conditions  
5 averted such exposures.  
6  
7  
8  
9

10  
11 Our study showed increased exposure in all age groups, but a remarkable observation was the  
12 high increase in exposure in the adolescents (11-15 y) group. It is possible that even though this  
13 age group understands what these chemicals are used for, they have little awareness about the  
14 potential toxicity. Other similar studies showed different age group observations. For example,  
15 the French poison center reported an increase in exposure in all age groups except 5-25 y group,  
16 and the most significant increase occurred in patients over 65 years [16]. Likewise, the Canadian  
17 poison center did not notice an increase in exposure in those below the age of 19 years [14]. In  
18 fact, children below five years represented a large percentage of calls received during the study  
19 period. This might be due to the closure of schools and kindergartens, with children spending  
20 more time at home, and therefore they have more chance for exposure [16]. Furthermore,  
21 Teleworking and homeschooling for older children contributed to such an increase by shifting  
22 parent's attention away from younger children [16].  
23  
24  
25  
26  
27  
28  
29  
30  
31  
32  
33  
34  
35  
36  
37  
38

39 Among routes of exposure, the ocular route recorded the sharpest increase. This observation may  
40 be due to the fact that eyes are involved in chemical exposure, whether by accidental spraying of  
41 the eyes or touching the eyes after hand or face sanitation or via exposure to vapors. A study  
42 from the United States found that inhalational route observed the highest increase during the  
43 lockdown [13].  
44  
45  
46  
47  
48  
49  
50

51 While intentional exposures increased during the lockdown, we suggest that the increase was due  
52 to attempts to protect from acquiring infection. Canadian poison center reported a similar  
53  
54  
55  
56  
57  
58  
59  
60



1  
2  
3 observation [14]. Oppositely; we have noticed that suicidal exposures during the lockdown have  
4 decreased. This fall could be arguably due to the social and family support created by the stay-at-  
5 home order. French poison center reported a similar observation [16].  
6  
7

8  
9  
10 We noted an increase in calls from healthcare workers. Oppositely, this increase was  
11 accompanied by a fall in the proportion of severe cases despite the increase in hospital  
12 admission. The French poison center reported similar findings [16]. There is no palpable cause  
13 for such a decrease; however, under-reporting plays a role as it was the responsibility of the Civil  
14 Defense Directorate (CDD) during the lockdown, which might be overwhelming and could lead  
15 to under-reporting. Another possibility is related to the change in the pattern of poisoning during  
16 the lockdown resulting in fewer severe and fatal exposures. Severe cases in Jordan have been  
17 previously described as caused by animal bites and stings, toxic plants, and food [35]. Our study  
18 shows that there has been a significant decrease in the above-mentioned agents during the  
19 lockdown. It is also important to mention the decrease in the number of suicide attempts using  
20 poisonous agents and efforts to increase awareness about early reporting of toxic exposures by  
21 the healthcare authorities.  
22  
23  
24  
25  
26  
27  
28  
29  
30  
31  
32  
33  
34  
35  
36  
37  
38

39 A previous retrospective study reported 1992 cases of acute poisoning in Jordan between 2014  
40 and 2018, with an average of 498 cases per year. The most commonly reported agents were  
41 drugs, household chemicals, and animal bites and stings. The male gender was more prevalent  
42 than females, and children were the most commonly affected groups. The majority of cases were  
43 reported to occur at home, and ingestion was the most common route. Furthermore, most  
44 exposures were unintentional, and the majority of cases were mild, with no deaths reported.  
45  
46  
47  
48  
49  
50  
51 Therefore, when comparing the previously mentioned study with our control period of March-  
52 May 2019, we cannot describe significant changes in the pattern of poisoning incidences [35].  
53  
54  
55  
56  
57  
58  
59  
60

1  
2  
3 This study has its strength and limitations. Our data represent the majority of calls related to  
4 toxic exposures in Jordan, as Pharmacy One™ poison center is the only center responsible for  
5 responding to calls from CDD, the primary emergency response service in Jordan (911). It also  
6 receives calls unrestrictedly from the public and healthcare workers at all times. However, this  
7 study has its limitations. Not all exposures were reported to the poison center, because many  
8 were treated at home or sought direct medical help without notifying the poison center.  
9 Furthermore, severely intoxicated or dead people usually arrive directly at the hospital without  
10 reporting the incidence to any poison center. In addition, poisoning specialists make their  
11 judgment and management recommendations based on the caller's information. Some cases were  
12 closed by simple advice over the phone without onsite confirmation of the nature of exposure.  
13 Lastly, there were difficulties accessing data from other poison centers.  
14  
15  
16  
17  
18  
19  
20  
21  
22  
23  
24  
25  
26  
27  
28

29 In conclusion, there is a change in both the number and pattern of toxic exposure related calls  
30 during the lockdown, mostly due to fear of coronavirus. Exposures related to toxic gases,  
31 alcohol, household cleaners, drugs, and domestic animal bites have increased, whereas exposures  
32 related to snake bites, scorpion stings, toxic plants, and occupational exposures have decreased.  
33 This observed increase in calls involved all age groups, with children below five years  
34 accounting for the largest percentage. Ocular exposures showed the sharpest increase among all  
35 exposure routes. While intentional exposures showed a remarkable increase, those exposures  
36 were not of suicidal nature. In fact, our study showed a decrease in suicidal exposures. In  
37 addition, calls from healthcare workers have increased, as well as case severity, while hospital  
38 admission rate increased. This study highlights the important role of poison centers, as they help  
39 decrease the burden on healthcare facilities. At poison centers, specialists respond to calls and  
40 triage the patients based on case severity to set an appropriate treatment plan. This alleviates  
41  
42  
43  
44  
45  
46  
47  
48  
49  
50  
51  
52  
53  
54  
55  
56  
57  
58  
59  
60

unnecessary use of ambulances and saves emergency room resources for severe cases.

Furthermore, specialists at poison centers are consulted by healthcare workers, thereby saving the cost of unwarranted patient transfer, investigations, laboratory work up, and, most importantly, evading case progression and complications. Poison centers can be referenced for evidence-based protocols, and the length of stay can be curtailed. Information about routes and types of exposures provided by poison centers is also valuable when setting healthcare policies.

**Conflict of interest:** The authors declare that there is no conflict of interest.

**Funding statement:** This research received no specific grant from any funding agency in the public, commercial or not-for-profit sectors

**Disclosures:** The authors have nothing to disclose.

**IRB approval:** According to IRB policy at our institution, this study is exempted from review and approval, as it is a retrospective review of records, where patient's names or personal information couldn't be identified.

**Data sharing statement:** Data supporting the finding of this article are available upon request.

**Authors contributions:**

LR, HD, KA, AF: Conceptualization, study design. LR, HD: project administration. AF: data collection. NH, HD: literature search and review. HD: draft the initial manuscript. LR, HD, MD, and SM: edit and write the final manuscript.

All authors read, edit, proof-read, and approve the final manuscript before submission.

**References:**

- [1]. Zhu N, Zhang D, Wang W, Li X, Yang B, Song J, et al. A Novel Coronavirus from Patients with Pneumonia in China, 2019. *N Engl J Med*. 2020;382(8):727–33.
- [2]. Adhanom T. WHO Director-General’s opening remarks at the media briefing on COVID-19—16 March 2020; 2020. World Health Organization: <https://www.who.int/dg/speeches/detail/who-director-general-s-opening-remarks-at-the-media-briefing-on-covid-19---11-march-2020>.
- [3]. Fisher D, Wilder-Smith A. The global community needs to swiftly ramp up the response to contain COVID-19. *Lancet*. 2020;395(10230):1109–10.
- [4]. Neil M F, Daniel L, Gemma N-G, Natsuko I, Ainslie K, Marc B, et al. Impact of non-pharmaceutical interventions (NPIs) to reduce COVID-19 mortality and healthcare demand. *Imp Coll COVID-19 Response Team*. 2020;(March).
- [5]. Wilder-Smith A, Freedman DO. Isolation, quarantine, social distancing and community containment: Pivotal role for old-style public health measures in the novel coronavirus (2019-nCoV) outbreak. *J Travel Med*. 2020;27(2):1–4.
- [6]. Anderson RM, Heesterbeek H, Klinkenberg D, Hollingsworth TD. How will country-based mitigation measures influence the course of the COVID-19 epidemic? *Lancet (London, England)*. 2020 Mar;395(10228):931–4.
- [7]. Lau H, Khosrawipour V, Kocbach P, Mikolajczyk A, Schubert J, Bania J, et al. The positive impact of lockdown in Wuhan on containing the COVID-19 outbreak in China. *J Travel Med*. 2021;27(3):1–7.
- [8]. Zarocostas J. How to fight an infodemic. *Lancet (London, England)*. 2020 Feb;395(10225):676.
- [9]. Depoux A, Martin S, Karafillakis E, Preet R, Wilder-Smith A, Larson H. The pandemic of social media panic travels faster than the COVID-19 outbreak. Vol. 27, *Journal of travel medicine*. 2020.
- [10]. Gottlieb M, Dyer S. Information and Disinformation: Social Media in the COVID-19 Crisis. *Acad Emerg Med Off J Soc Acad Emerg Med*. 2020 Jul;27(7):640–1.

- 1  
2  
3 [11]. The Lancet Infectious Diseases. The COVID-19 infodemic. *Lancet Infect Dis*.  
4 2020;20(8):875.  
5  
6  
7 [12]. Galvão J. COVID-19: the deadly threat of misinformation. Vol. 21, *The Lancet. Infectious*  
8 *diseases*. 2021. p. e114.  
9  
10  
11 [13]. Chang A, Schnall AH, Law R, Bronstein AC, Marraffa JM, Spiller HA, et al. Cleaning and  
12 Disinfectant Chemical Exposures and Temporal Associations with COVID-19 — National  
13 Poison Data System, United States, January 1, 2020–March 31, 2020. *MMWR Morb Mortal*  
14 *Wkly Rep*. 2020;69(16):496–8.  
15  
16  
17 [14]. Yasseen A, Weiss D, Remer S, Dobbin N, Macneill M, Bogeljic B, et al. Increases in  
18 exposure calls related to selected cleaners and disinfectants at the onset of the covid-19  
19 pandemic: Data from canadian poison centres. *Heal Promot Chronic Dis Prev Canada*.  
20 2021;41(1):25–9.  
21  
22  
23 [15]. Le Roux G, Sinno-Tellier S, Descatha A. COVID-19: home poisoning throughout the  
24 containment period. *Lancet Public Heal*. 2020;5(6):e314.  
25  
26  
27 [16]. Roux G Le, Sinno-Tellier S, Puskarczyk E, Labadie M, von Fabeck K, Pélissier F, et al.  
28 Poisoning during the COVID-19 outbreak and lockdown: retrospective analysis of exposures  
29 reported to French poison control centres. *Clin Toxicol [Internet]*. 2021;59(9):832–9.  
30 Available from: <https://doi.org/10.1080/15563650.2021.1874402>  
31  
32  
33  
34  
35 [17]. Richards GC. Alcohol-based hand sanitisers: a warning to mitigate future poisonings and  
36 deaths. *BMJ Evidence-Based Med [Internet]*. 2021;26(2):65–8. Available from:  
37 <https://ebm.bmj.com/content/26/2/65>  
38  
39  
40  
41 [18]. Wong A. COVID-19 and toxicity from potential treatments: Panacea or poison. *EMA -*  
42 *Emerg Med Australas*. 2020;32(4):697–9.  
43  
44  
45 [19]. Delirrad M, Mohammadi AB. New Methanol Poisoning Outbreaks in Iran Following  
46 COVID-19 Pandemic. Vol. 55, *Alcohol and alcoholism (Oxford, Oxfordshire)*. 2020. p. 347–  
47 8.  
48  
49  
50 [20]. Yip L, Bixler D, Brooks DE, Clarke KR, Datta SD, Dudley S, et al. Serious Adverse Health  
51 Events, Including Death, Associated with Ingesting Alcohol-Based Hand Sanitizers  
52 Containing Methanol — Arizona and New Mexico, May–June 2020. *MMWR Morb Mortal*  
53 *Wkly Rep*. 2020;69(32):1070–3.  
54  
55  
56  
57  
58  
59  
60

- 1  
2  
3  
4  
5 [21]. Clay JM, Parker MO. Alcohol use and misuse during the COVID-19 pandemic: a potential  
6 public health crisis? Vol. 5, *The Lancet. Public health*. 2020. p. e259.  
7
- 8 [22]. Chary MA, Barbuto AF, Izadmehr S, Hayes BD, Burns MM. COVID-19: Therapeutics and  
9 Their Toxicities. *J Med Toxicol*. 2020;16(3):284–94.  
10  
11
- 12 [23]. Defence Order No. (2) [Internet]. Pm.gov.jo. 2021. Available from:  
13 <http://www.pm.gov.jo/upload/files/Order-Defense-2.pdf>  
14  
15
- 16 [24]. Bronstein AC, Spyker DA, Cantilena LRJ, Green JL, Rumack BH, Heard SE. 2007 Annual  
17 Report of the American Association of Poison Control Centers' National Poison Data  
18 System (NPDS): 25th Annual Report. *Clin Toxicol (Phila)*. 2008 Dec;46(10):927–1057.  
19  
20
- 21 [25]. Persson HE, Sjöberg GK, Haines JA, Pronczuk de Garbino J. Poisoning severity score.  
22 Grading of acute poisoning. *J Toxicol Clin Toxicol*. 1998;36(3):205–13.  
23  
24
- 25 [26]. Detailed Toxicology Information From POISINDEX [Internet]. [cited 2021 Sep 2].  
26 Available from:  
27 [https://www.micromedexsolutions.com/micromedex2/4.77.0/WebHelp/Document\\_help/Toxi](https://www.micromedexsolutions.com/micromedex2/4.77.0/WebHelp/Document_help/Toxicology_Management_document.htm)  
28 [cology\\_Management\\_document.htm](https://www.micromedexsolutions.com/micromedex2/4.77.0/WebHelp/Document_help/Toxicology_Management_document.htm)  
29  
30  
31
- 32 [27]. Pollard MS, Tucker JS, Green HDJ. Changes in Adult Alcohol Use and Consequences  
33 During the COVID-19 Pandemic in the US. *JAMA Netw open*. 2020 Sep;3(9):e2022942.  
34  
35
- 36 [28]. Neufeld M, Lachenmeier DW, Ferreira-Borges C, Rehm J. Is Alcohol an “Essential Good”  
37 During COVID-19? Yes, but Only as a Disinfectant! *Alcohol Clin Exp Res* [Internet].  
38 2020;44(9):1906–9. Available from:  
39 <https://onlinelibrary.wiley.com/doi/abs/10.1111/acer.14417>  
40  
41  
42
- 43 [29]. PHE. Monitoring alcohol consumption and harm during the COVID-19 pandemic. 2021;  
44 Available from:  
45 [https://assets.publishing.service.gov.uk/government/uploads/system/uploads/attachment\\_data](https://assets.publishing.service.gov.uk/government/uploads/system/uploads/attachment_data/file/1002627/Alcohol_and_COVID_report.pdf)  
46 [/file/1002627/Alcohol\\_and\\_COVID\\_report.pdf](https://assets.publishing.service.gov.uk/government/uploads/system/uploads/attachment_data/file/1002627/Alcohol_and_COVID_report.pdf)  
47  
48
- 49 [30]. The Ontario Drug Policy Research Network, The Office of the Chief Coroner for  
50 Ontario/Ontario Forensic Pathology Service, Public Health Ontario, Centre on Drug Policy  
51 Evaluation. Preliminary Patterns in Circumstances Surrounding Opioid-Related Deaths in  
52 Ontario during the COVID-19 Pandemic. 2020;(November):1–24. Available from:  
53  
54  
55  
56  
57  
58  
59  
60

<https://www.publichealthontario.ca/-/media/documents/o/2020/opioid-mortality-covid-surveillance-report.pdf?la=en>

- [31]. Wainwright JJ, Mikre M, Whitley P, Dawson E, Huskey A, Lukowiak A, et al. Analysis of Drug Test Results Before and After the US Declaration of a National Emergency Concerning the COVID-19 Outbreak. *JAMA*. 2020 Oct;324(16):1674–7.
- [32]. Wakeman SE, Green TC, Rich J. An overdose surge will compound the COVID-19 pandemic if urgent action is not taken. *Nat Med*. 2020 Jun;26(6):819–20.
- [33]. European Monitoring Centre for Drugs and Drug Addiction (EMCDDA). Impact of COVID-19 on patterns of drug use and drug-related harms in Europe (Trendspotter briefing). 2020;(June):1–27. Available from: [https://www.emcdda.europa.eu/system/files/publications/13130/EMCDDA-Trendspotter-Covid-19-Wave-2\\_1.pdf](https://www.emcdda.europa.eu/system/files/publications/13130/EMCDDA-Trendspotter-Covid-19-Wave-2_1.pdf)
- [34]. Dixon CA, Mistry RD. Dog Bites in Children Surge during Coronavirus Disease-2019: A Case for Enhanced Prevention. *J Pediatr*. 2020 Oct;225:231–2.
- [35]. Albals D, Yehya A, Issa R, Fawadleh A. Retrospective assessment of acute poisoning incidents by nonpharmaceutical agents in Jordan: Data from Pharmacy One™ Poison Call Center, 2014 to 2018-Part I. *Pharmacol Res Perspect*. 2020 Apr;8(2):e00582.

Table 1: Incidence and Patterns of Toxic exposures and poisoning Among Jordanian Population during COVID-19 Lockdown and 2019 (March-May).

|                       |                         | 2019            | COVID-19 Lockdown | % of Δ |
|-----------------------|-------------------------|-----------------|-------------------|--------|
|                       |                         | Number of Cases | Number of Cases   |        |
| Total Number of Cases |                         | 285             | 544               | 91%    |
| Class of Exposure     | Drugs                   | 141 (49%)       | 321 (59%)         | 128%   |
|                       | Household Cleaners*     | 32 (11%)        | 83 (15%)          | 159%   |
|                       | Alcohol*                | 12 (4%)         | 37 (7%)           | 208%   |
|                       | Pesticides              | 20 (7%)         | 20 (4%)           | 0%     |
|                       | Hydrocarbons*           | 16 (6%)         | 17 (3%)           | 6%     |
|                       | Food                    | 17 (6%)         | 14 (3%)           | -18%   |
|                       | Insect bites            | 14 (5%)         | 15 (3%)           | 7%     |
|                       | Domestic Animals bites* | 4 (1%)          | 11 (2%)           | 175%   |
|                       | Heavy Metals            | 9 (3%)          | 12 (2%)           | 33%    |
|                       | Toxic Gases (chlorine)* | 2 (1%)          | 8 (1%)            | 300%   |
|                       | Scorpion stings         | 11 (4%)         | 5 (1%)            | -55%   |
|                       | Snake bites             | 5 (2%)          | 0 (0%)            | -100%  |
| Toxic Plants          | 2 (1%)                  | 1 (0%)          | -50%              |        |
| Route of Exposure     | Ingestion               | 219 (77%)       | 446 (82%)         | 104%   |
|                       | Inhalation              | 12 (4%)         | 18 (3%)           | 50%    |
|                       | Dermal                  | 46 (16%)        | 56 (10%)          | 22%    |
|                       | Paraneral               | 3 (1%)          | 3 (1%)            | 0%     |
|                       | Ocular                  | 2 (1%)          | 13 (2%)           | 550%   |
|                       | Others*                 | 3 (1%)          | 8 (1%)            | 167%   |
| Site of Exposure      | Work                    | 5 (2%)          | 2 (0%)            | -60%   |
|                       | Outdoor                 | 19 (7%)         | 14 (3%)           | -26%   |
|                       | Home                    | 260 (91%)       | 528 (97%)         | 103%   |
|                       | School                  | 1 (0%)          | 0 (0%)            | -100%  |

|                               |                                 |                           |          |                            |           |             |               |
|-------------------------------|---------------------------------|---------------------------|----------|----------------------------|-----------|-------------|---------------|
| Reason of Exposure            | Suicidal                        | 36 (13%)                  |          | 33 (6%)                    |           | -8%         |               |
|                               | Unintentional                   | 168 (59%)                 |          | 406 (75%)                  |           | 142%        |               |
|                               | Occupational                    | 9 (3%)                    |          | 0 (0%)                     |           | -100%       |               |
|                               | Medical Consultation*           | 14 (5%)                   |          | 14 (3%)                    |           | 0%          |               |
|                               | Therapeutic*                    | 16 (6%)                   |          | 35 (6%)                    |           | 119%        |               |
|                               | Intentional                     | 3 (1%)                    |          | 31 (6%)                    |           | 933%        |               |
|                               | Medical Error                   | 8 (3%)                    |          | 22 (4%)                    |           | 175%        |               |
|                               | Bite/Sting                      | 31 (11%)                  |          | 3 (1%)                     |           | -90%        |               |
| Distribution by Age Groups    | 0-5 y                           | 142 (50%)                 |          | 332 (61%)                  |           | 134%        |               |
|                               | 6-10 y                          | 18 (6%)                   |          | 29 (5%)                    |           | 61%         |               |
|                               | 11-15 y                         | 4 (1%)                    |          | 15 (3%)                    |           | 275%        |               |
|                               | 16-20 y                         | 15 (5%)                   |          | 30 (6%)                    |           | 100%        |               |
|                               | 21-50 y                         | 92 (32%)                  |          | 104 (19%)                  |           | 13%         |               |
|                               | >50 y                           | 14 (5%)                   |          | 34 (6%)                    |           | 143%        |               |
| Gender Variation              |                                 | Male                      | Female   | Male                       | Female    | Male % of A | Female % of A |
|                               | Drugs                           | 84 (51%)                  | 57 (48%) | 198 (64%)                  | 123 (53%) | 136%        | 116%          |
|                               | Pesticides                      | 10 (6%)                   | 10 (8%)  | 9 (3%)                     | 11 (5%)   | -10%        | 10%           |
|                               | Toxic Plants                    | 2 (1%)                    | 0 (0%)   | 0 (0%)                     | 1 (0%)    | -100%       | NA            |
|                               | Scorpion stings                 | 6 (4%)                    | 5 (4%)   | 4 (1%)                     | 1 (0%)    | -33%        | -80%          |
|                               | Snake bites                     | 4 (2%)                    | 1 (1%)   | 0 (0%)                     | 0 (0%)    | -100%       | -100%         |
|                               | Insect bites                    | 11 (7%)                   | 3 (3%)   | 6 (2%)                     | 9 (4%)    | -45%        | 200%          |
|                               | Toxic Gases (chlorine)          | 1 (1%)                    | 1 (1%)   | 4 (1%)                     | 4 (2%)    | 300%        | 300%          |
|                               | Heavy Metals                    | 4 (2%)                    | 5 (4%)   | 6 (2%)                     | 6 (3%)    | 50%         | 20%           |
|                               | Household Cleaners              | 14 (8%)                   | 18 (15%) | 47 (15%)                   | 36 (15%)  | 236%        | 100%          |
|                               | Hydrocarbons                    | 10 (6%)                   | 6 (5%)   | 11 (4%)                    | 6 (3%)    | 10%         | 0%            |
|                               | Domestic Animals bites          | 4 (2%)                    | 0 (0%)   | 7 (2%)                     | 4 (2%)    | 75%         | NA            |
| Food                          | 10 (6%)                         | 7 (6%)                    | 5 (2%)   | 9 (4%)                     | -50%      | 29%         |               |
| Alcohol                       | 5 (3%)                          | 7 (6%)                    | 13 (4%)  | 24 (10%)                   | 160%      | 243%        |               |
| Source of Calls               | General public                  | 93 (33%)                  |          | 156 (29%)                  |           | 68%         |               |
|                               | Civil Defense Directorate (911) | 108 (38%)                 |          | 292 (54%)                  |           | 170%        |               |
|                               | Health Care Workers             | 84 (29%)                  |          | 96 (18%)                   |           | 14%         |               |
| Medical Outcome Based on PSS* | Non (No effect)                 | 26 (9%)                   |          | 201 (37%)                  |           | 673%        |               |
|                               | minor                           | 95 (33%)                  |          | 228 (42%)                  |           | 140%        |               |
|                               | Moderate                        | 131 (46%)                 |          | 90 (17%)                   |           | -31%        |               |
|                               | Severe                          | 33 (12%)                  |          | 25 (5%)                    |           | -24%        |               |
|                               | Death                           | 0 (0%)                    |          | 0 (0%)                     |           | 0%          |               |
| Hospital Admissions           | Number of Admissions            | 15 (5%)                   |          | 54 (10%)                   |           | 260%        |               |
|                               | Children from 0-5 Years         | 7 (47%)                   |          | 30 (56%)                   |           | 329%        |               |
| Emergency Services Dispatch   |                                 | 80 out of 108 cases (74%) |          | 119 out of 292 cases (41%) |           | -33%        |               |

\* Household cleaners: Products containing (ammonia, hydrochloric acid, sodium hypochlorite, or alkaline cleaning products - Drain and oven cleaners...etc). Alcohol: ethanol-based cleaning solutions, hand sanitizers or pure ethanol as spray (not for intake). Hydrocarbons: mainly paint thinners and kerosene. Domestic Animals Bites: from dogs, cats, and hamsters. Toxic gases: inhaled chlorine. Other routes of exposure: include rectal and unknown routes. Medical Consultation: only reported consultations without reports of toxicity. Therapeutic reasons: include incidents reported as side effects of medication and drugs. NA: not applicable (mathematical causes), PSS: Poisoning Severity Score. n (n%)

## Figures Legend:

### Figure 1: Class of Exposure

This chart shows the difference in classes of exposure when comparing the period of 2019 to COVID-19 lockdown.

### Figure 2: Route of Exposure



1  
2  
3 This chart shows changes in routes of exposure in both studied periods.  
4  
5  
6  
7

8  
9 **Figure 3: Site of Exposure**

10  
11  
12 In this chart, changes in sites of exposure are shown.  
13  
14  
15

16  
17 **Figure 4: Reason of Exposure**

18  
19  
20 Reasons for exposure for both periods are set side by side, showing variance.  
21  
22  
23

24  
25 **Figure 5: Gender Variation**

26  
27 This chart shows the prevalence of toxic exposures across different age groups.  
28  
29  
30  
31  
32

33  
34 **Figure 6: Distribution across Age Groups**

35  
36 In this chart, a correlation between different exposure classes and gender is highlighted  
37  
38  
39  
40  
41

42  
43 **Figure 7: Source of Calls**

44  
45 This chart shows the difference in the source of calls in both studied periods.  
46  
47  
48

49  
50 **Figure 8: Medical Outcome Including Admission**

51  
52 Changes in medical outcomes are shown in this chart. It also includes changes in the percentage of admissions and  
53 percentage of children admitted during both periods  
54  
55  
56  
57  
58  
59  
60

1  
2  
3  
4  
5  
6  
7  
8  
9  
10  
11  
12  
13  
14  
15  
16  
17  
18  
19  
20  
21  
22  
23  
24  
25  
26  
27  
28  
29  
30  
31  
32  
33  
34  
35  
36  
37  
38  
39  
40  
41  
42  
43  
44  
45  
46  
47  
48  
49  
50  
51  
52  
53  
54  
55  
56  
57  
58  
59  
60

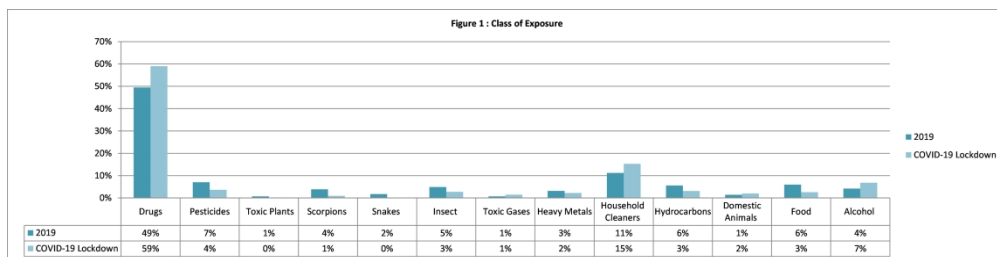

Figure 1: Class of Exposure

353x89mm (300 x 300 DPI)

1  
2  
3  
4  
5  
6  
7  
8  
9  
10  
11  
12  
13  
14  
15  
16  
17  
18  
19  
20  
21  
22  
23  
24  
25  
26  
27  
28  
29  
30  
31  
32  
33  
34  
35  
36  
37  
38  
39  
40  
41  
42  
43  
44  
45  
46  
47  
48  
49  
50  
51  
52  
53  
54  
55  
56  
57  
58  
59  
60

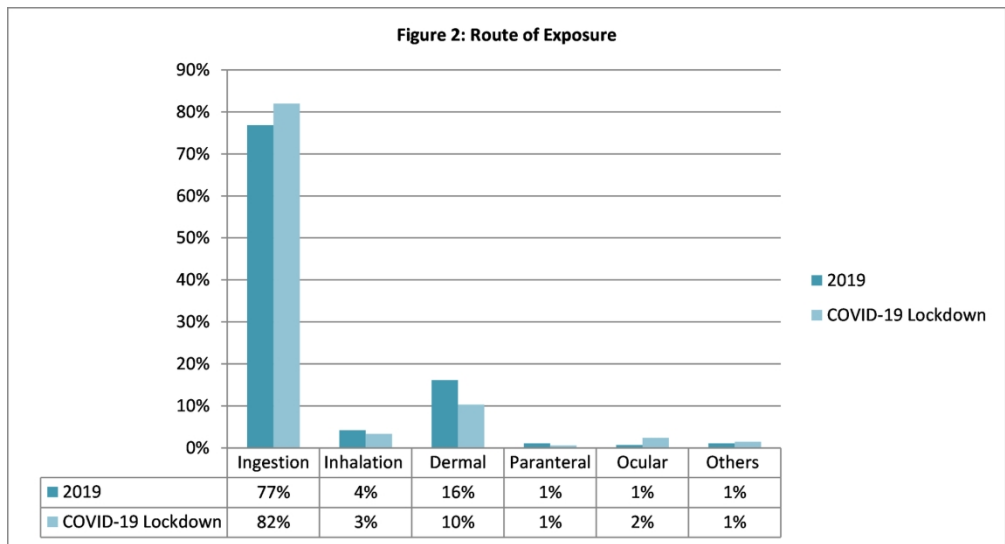

Figure 2: Route of Exposure

182x98mm (300 x 300 DPI)

1  
2  
3  
4  
5  
6  
7  
8  
9  
10  
11  
12  
13  
14  
15  
16  
17  
18  
19  
20  
21  
22  
23  
24  
25  
26  
27  
28  
29  
30  
31  
32  
33  
34  
35  
36  
37  
38  
39  
40  
41  
42  
43  
44  
45  
46  
47  
48  
49  
50  
51  
52  
53  
54  
55  
56  
57  
58  
59  
60

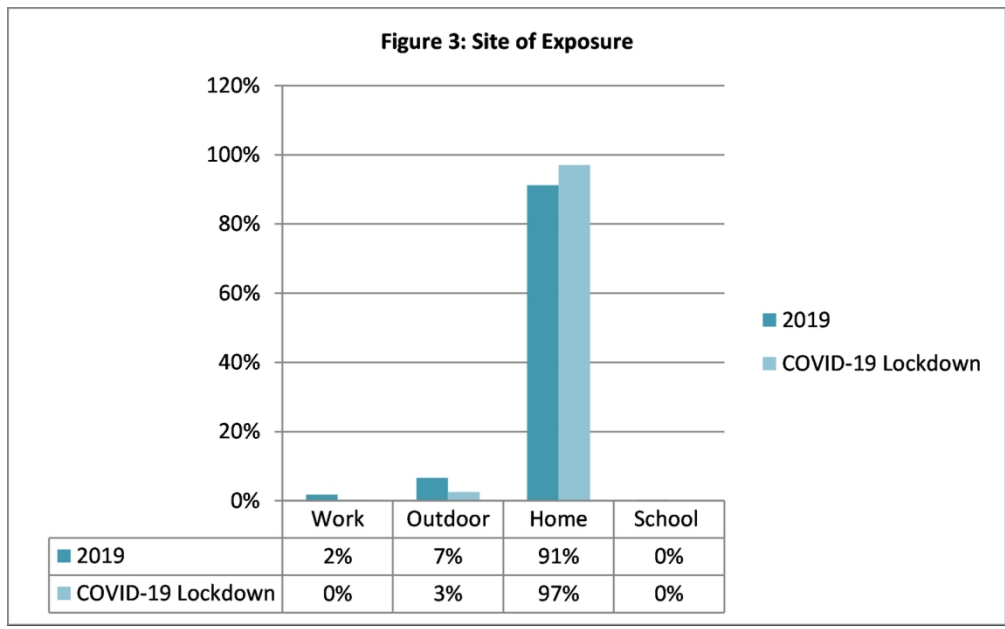

Figure 3: Site of Exposure

146x90mm (300 x 300 DPI)

1  
2  
3  
4  
5  
6  
7  
8  
9  
10  
11  
12  
13  
14  
15  
16  
17  
18  
19  
20  
21  
22  
23  
24  
25  
26  
27  
28  
29  
30  
31  
32  
33  
34  
35  
36  
37  
38  
39  
40  
41  
42  
43  
44  
45  
46  
47  
48  
49  
50  
51  
52  
53  
54  
55  
56  
57  
58  
59  
60

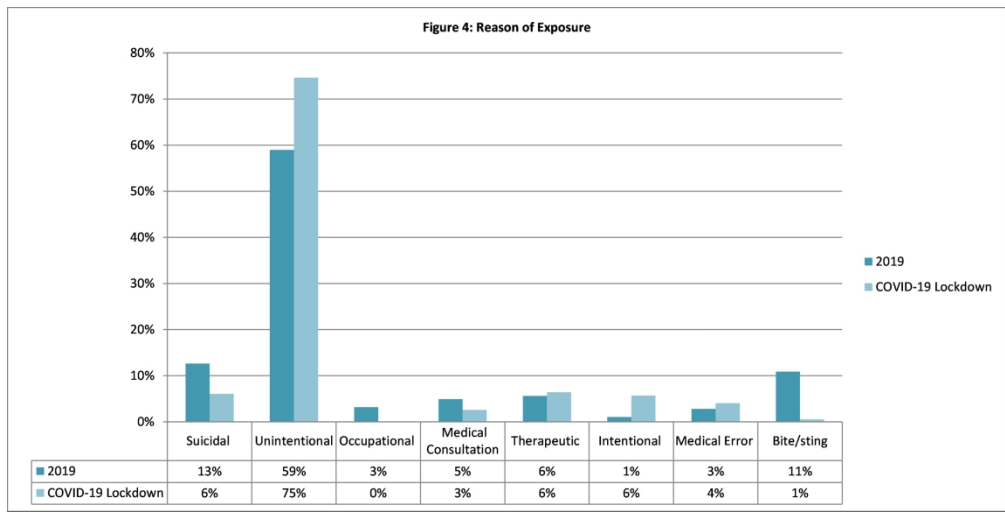

Figure 4: Reason of Exposure

250x126mm (300 x 300 DPI)

1  
2  
3  
4  
5  
6  
7  
8  
9  
10  
11  
12  
13  
14  
15  
16  
17  
18  
19  
20  
21  
22  
23  
24  
25  
26  
27  
28  
29  
30  
31  
32  
33  
34  
35  
36  
37  
38  
39  
40  
41  
42  
43  
44  
45  
46  
47  
48  
49  
50  
51  
52  
53  
54  
55  
56  
57  
58  
59  
60

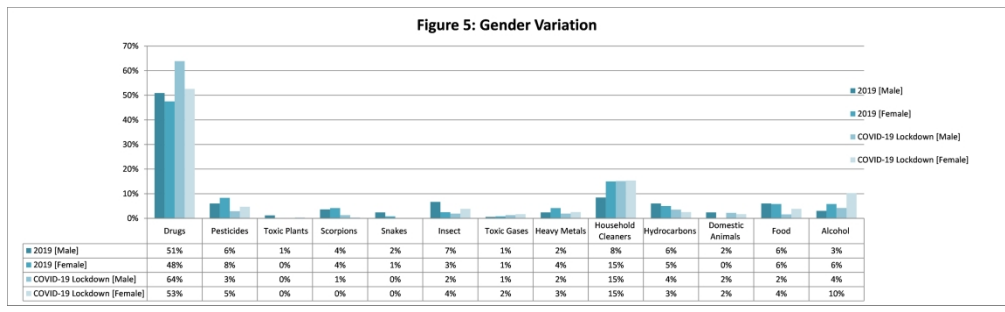

Figure 5: Gender Variation  
383x114mm (300 x 300 DPI)

1  
2  
3  
4  
5  
6  
7  
8  
9  
10  
11  
12  
13  
14  
15  
16  
17  
18  
19  
20  
21  
22  
23  
24  
25  
26  
27  
28  
29  
30  
31  
32  
33  
34  
35  
36  
37  
38  
39  
40  
41  
42  
43  
44  
45  
46  
47  
48  
49  
50  
51  
52  
53  
54  
55  
56  
57  
58  
59  
60

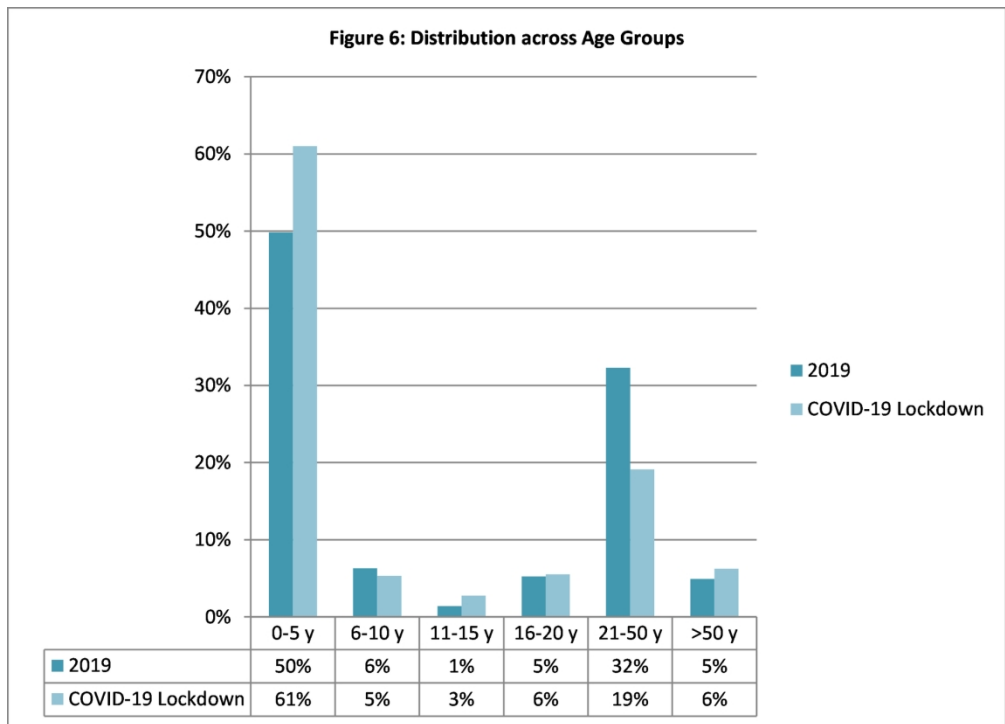

Figure 6: Distribution across Age Groups

165x118mm (300 x 300 DPI)

1  
2  
3  
4  
5  
6  
7  
8  
9  
10  
11  
12  
13  
14  
15  
16  
17  
18  
19  
20  
21  
22  
23  
24  
25  
26  
27  
28  
29  
30  
31  
32  
33  
34  
35  
36  
37  
38  
39  
40  
41  
42  
43  
44  
45  
46  
47  
48  
49  
50  
51  
52  
53  
54  
55  
56  
57  
58  
59  
60

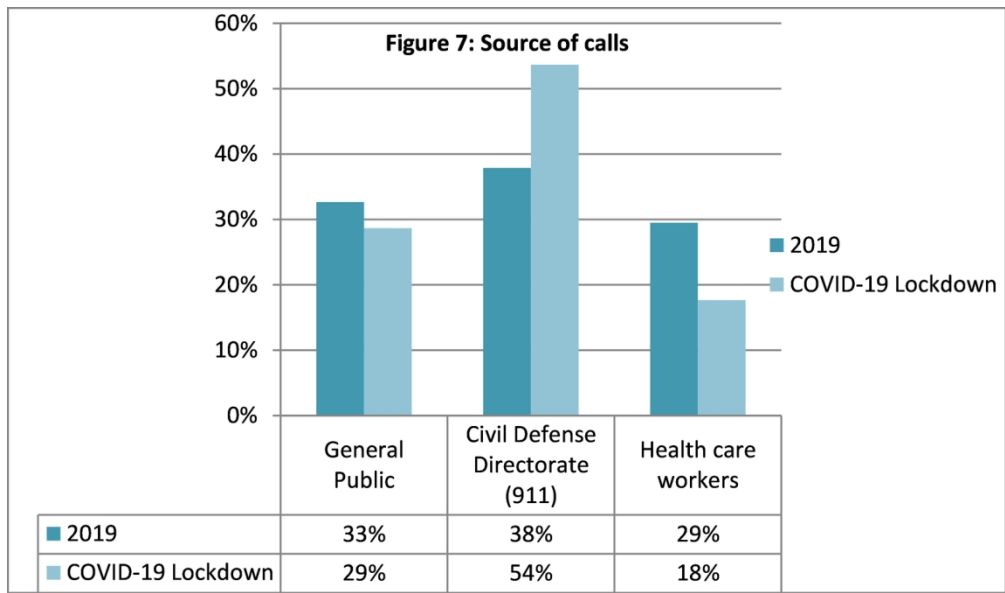

Figure 7: Source of Calls

140x82mm (300 x 300 DPI)



1  
2  
3  
4  
5  
6  
7  
8  
9  
10  
11  
12  
13  
14  
15  
16  
17  
18  
19  
20  
21  
22  
23  
24  
25  
26  
27  
28  
29  
30  
31  
32  
33  
34  
35  
36  
37  
38  
39  
40  
41  
42  
43  
44  
45  
46  
47  
48  
49  
50  
51  
52  
53  
54  
55  
56  
57  
58  
59  
60

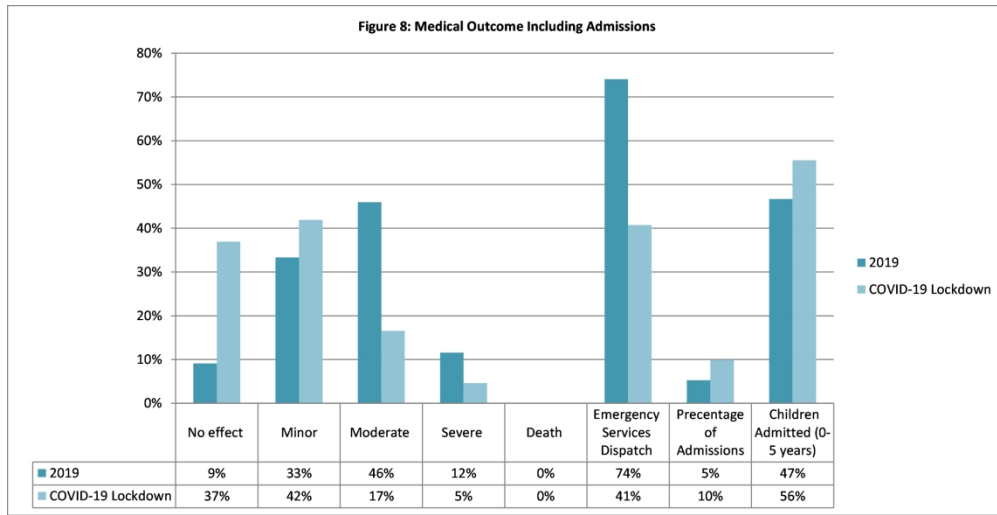

Figure 8: Medical Outcome Including Admissions

238x121mm (300 x 300 DPI)

## STROBE Statement—checklist of items that should be included in reports of observational studies

|                           | Item No | Recommendation                                                                                                                                                                             | Page No |
|---------------------------|---------|--------------------------------------------------------------------------------------------------------------------------------------------------------------------------------------------|---------|
| <b>Title and abstract</b> | 1       | (a) Indicate the study's design with a commonly used term in the title or the abstract                                                                                                     | 1,2     |
|                           |         | (b) Provide in the abstract an informative and balanced summary of what was done and what was found                                                                                        | 2       |
| <b>Introduction</b>       |         |                                                                                                                                                                                            |         |
| Background/rationale      | 2       | Explain the scientific background and rationale for the investigation being reported                                                                                                       | 5,6     |
| Objectives                | 3       | State specific objectives, including any prespecified hypotheses                                                                                                                           | 4       |
| <b>Methods</b>            |         |                                                                                                                                                                                            |         |
| Study design              | 4       | Present key elements of study design early in the paper                                                                                                                                    | 4       |
| Setting                   | 5       | Describe the setting, locations, and relevant dates, including periods of recruitment, exposure, follow-up, and data collection                                                            | 5,6,7   |
| Participants              | 6       | (a) <i>Cohort study</i> —Give the eligibility criteria, and the sources and methods of selection of participants. Describe methods of follow-up                                            | -       |
|                           |         | <i>Case-control study</i> —Give the eligibility criteria, and the sources and methods of case ascertainment and control selection. Give the rationale for the choice of cases and controls | -       |
|                           |         | <i>Cross-sectional study</i> —Give the eligibility criteria, and the sources and methods of selection of participants                                                                      | -       |
|                           |         | (b) <i>Cohort study</i> —For matched studies, give matching criteria and number of exposed and unexposed                                                                                   | -       |
|                           |         | <i>Case-control study</i> —For matched studies, give matching criteria and the number of controls per case                                                                                 | -       |
| Variables                 | 7       | Clearly define all outcomes, exposures, predictors, potential confounders, and effect modifiers. Give diagnostic criteria, if applicable                                                   | 5,6,7   |
| Data sources/measurement  | 8*      | For each variable of interest, give sources of data and details of methods of assessment (measurement). Describe comparability of assessment methods if there is more than one group       | 5,6,7   |
| Bias                      | 9       | Describe any efforts to address potential sources of bias                                                                                                                                  | 5       |
| Study size                | 10      | Explain how the study size was arrived at                                                                                                                                                  | 7       |
| Quantitative variables    | 11      | Explain how quantitative variables were handled in the analyses. If applicable, describe which groupings were chosen and why                                                               | -       |
| Statistical methods       | 12      | (a) Describe all statistical methods, including those used to control for confounding                                                                                                      | 7       |
|                           |         | (b) Describe any methods used to examine subgroups and interactions                                                                                                                        | -       |
|                           |         | (c) Explain how missing data were addressed                                                                                                                                                | -       |
|                           |         | (d) <i>Cohort study</i> —If applicable, explain how loss to follow-up was addressed                                                                                                        | -       |
|                           |         | <i>Case-control study</i> —If applicable, explain how matching of cases and controls was addressed                                                                                         | -       |
|                           |         | <i>Cross-sectional study</i> —If applicable, describe analytical methods taking account of sampling strategy                                                                               | -       |
|                           |         | (e) Describe any sensitivity analyses                                                                                                                                                      | -       |

Continued on next page

1  
2  
3  
4  
5  
6  
7  
8  
9  
10  
11  
12  
13  
14  
15  
16  
17  
18  
19  
20  
21  
22  
23  
24  
25  
26  
27  
28  
29  
30  
31  
32  
33  
34  
35  
36  
37  
38  
39  
40  
41  
42  
43  
44  
45  
46  
47  
48  
49  
50  
51  
52  
53  
54  
55  
56  
57  
58  
59  
60

| <b>Results</b>           |     |                                                                                                                                                                                                              |        |
|--------------------------|-----|--------------------------------------------------------------------------------------------------------------------------------------------------------------------------------------------------------------|--------|
| Participants             | 13* | (a) Report numbers of individuals at each stage of study—eg numbers potentially eligible, examined for eligibility, confirmed eligible, included in the study, completing follow-up, and analysed            | -      |
|                          |     | (b) Give reasons for non-participation at each stage                                                                                                                                                         | -      |
|                          |     | (c) Consider use of a flow diagram                                                                                                                                                                           | -      |
| Descriptive data         | 14* | (a) Give characteristics of study participants (eg demographic, clinical, social) and information on exposures and potential confounders                                                                     | 7      |
|                          |     | (b) Indicate number of participants with missing data for each variable of interest                                                                                                                          | -      |
|                          |     | (c) <i>Cohort study</i> —Summarise follow-up time (eg, average and total amount)                                                                                                                             | -      |
| Outcome data             | 15* | <i>Cohort study</i> —Report numbers of outcome events or summary measures over time                                                                                                                          | -      |
|                          |     | <i>Case-control study</i> —Report numbers in each exposure category, or summary measures of exposure                                                                                                         | -      |
|                          |     | <i>Cross-sectional study</i> —Report numbers of outcome events or summary measures                                                                                                                           | 8,9,10 |
| Main results             | 16  | (a) Give unadjusted estimates and, if applicable, confounder-adjusted estimates and their precision (eg, 95% confidence interval). Make clear which confounders were adjusted for and why they were included | 8,9,10 |
|                          |     | (b) Report category boundaries when continuous variables were categorized                                                                                                                                    | -      |
|                          |     | (c) If relevant, consider translating estimates of relative risk into absolute risk for a meaningful time period                                                                                             | -      |
| Other analyses           | 17  | Report other analyses done—eg analyses of subgroups and interactions, and sensitivity analyses                                                                                                               | -      |
| <b>Discussion</b>        |     |                                                                                                                                                                                                              |        |
| Key results              | 18  | Summarise key results with reference to study objectives                                                                                                                                                     | 10     |
| Limitations              | 19  | Discuss limitations of the study, taking into account sources of potential bias or imprecision. Discuss both direction and magnitude of any potential bias                                                   | 15     |
| Interpretation           | 20  | Give a cautious overall interpretation of results considering objectives, limitations, multiplicity of analyses, results from similar studies, and other relevant evidence                                   | 10-14  |
| Generalisability         | 21  | Discuss the generalisability (external validity) of the study results                                                                                                                                        | 16     |
| <b>Other information</b> |     |                                                                                                                                                                                                              |        |
| Funding                  | 22  | Give the source of funding and the role of the funders for the present study and, if applicable, for the original study on which the present article is based                                                | 16     |

\*Give information separately for cases and controls in case-control studies and, if applicable, for exposed and unexposed groups in cohort and cross-sectional studies.

**Note:** An Explanation and Elaboration article discusses each checklist item and gives methodological background and published examples of transparent reporting. The STROBE checklist is best used in conjunction with this article (freely available on the Web sites of PLoS Medicine at <http://www.plosmedicine.org/>, Annals of Internal Medicine at <http://www.annals.org/>, and Epidemiology at <http://www.epidem.com/>). Information on the STROBE Initiative is available at [www.strobe-statement.org](http://www.strobe-statement.org).
